1 **Phosphorylation of the GARP Subunit Vps53 by Snf1 Leads to the**  
2 **Formation of a Golgi – Mitochondria Contact Site (GoMiCS) in Yeast**

3

4 **Susanne A. Wycislo<sup>1</sup>, Celine Sundag<sup>1</sup>, Stefan Walter<sup>2</sup>, Sebastian Schuck<sup>3</sup> and**  
5 **Florian Fröhlich<sup>1,2\*</sup>**

6

7 <sup>1</sup>Department of Biology/Chemistry  
8 Molecular Membrane Biology Group  
9 University of Osnabrück  
10 Barbarastraße 13  
11 49076 Osnabrück, Germany

12

13 <sup>2</sup>Center of Cellular Nanoanalytics Osnabrück  
14 Barbarastraße 11  
15 49076 Osnabrück, Germany

16

17 <sup>3</sup>Center for Molecular Biology of Heidelberg University (ZMBH)  
18 Im Neuenheimer Feld 282  
19 69120 Heidelberg, Germany

20

21

22

23

24

25

26

27

28

29

30

31 \*Corresponding author:

32 Email: [florian.froehlich@uni-osnabrueck.de](mailto:florian.froehlich@uni-osnabrueck.de)

33 Phone: +49-541-969-29

34 **Abstract**

35 The canonical function of the Golgi-associated retrograde protein (GARP) complex is  
36 the tethering of transport carriers. GARP belongs to the complexes associated with  
37 tethering containing helical rods (CATCHR) family and is a hetero-tetrameric complex  
38 consisting of the subunits Vps51, Vps52, Vps53 and Vps54. How the activity of GARP  
39 is regulated and if it possesses other functions besides tethering remains largely  
40 unknown. Here we identify the GARP subunit Vps53 as a novel regulatory target of the  
41 *S. cerevisiae* AMP kinase (AMPK) homolog Snf1. We find that Vps53 is both an *in vivo*  
42 and *in vitro* target of Snf1 and show that phosphorylation depends on the nature and  
43 quantity of the available carbon source. Phosphorylation of Vps53 does not affect the  
44 canonical trafficking pathway, but results in altered mitochondrial dynamics and the  
45 formation of a previously unknown contact site between the Golgi apparatus and  
46 mitochondria, termed GoMiCS. Our results provide an example of a subunit of a  
47 CATCHR complex with a constitutive function in membrane trafficking and an inducible  
48 role in organelle contact site formation. We anticipate our results to be the starting point  
49 for the characterization of this novel contact site.

50

51

52

53

54

55

56

57

58

59

60

61

62

## 63 Introduction

64 Eukaryotic cells are highly compartmentalized into membrane-surrounded organelles  
65 to create optimized environments tailored to specialized biochemical reactions. To  
66 maintain the specific identity of each organelle, proteins and lipids have to be  
67 transported within cells to their correct destination. This complex task is achieved by  
68 vesicular trafficking between organelles as well as by a network of membrane contact  
69 sites (Bonifacino and Glick, 2004; Guo *et al.*, 2014; Eisenberg-Bord *et al.*, 2016; Gatta  
70 and Levine, 2017). Both vesicular trafficking and the formation of membrane contact  
71 sites are highly regulated by the metabolic state of cells (Jones *et al.*, 2012; Aoh *et al.*,  
72 2013; Hönscher *et al.*, 2014; Prinz, 2014).

73 Two major trafficking pathways operate in cells to maintain the balance between  
74 anabolic and catabolic processes, the secretory and the endocytic pathway (Maxfield  
75 and McGraw, 2004; Guo *et al.*, 2014; Kim and Gadila, 2016). The Golgi apparatus is  
76 the central sorting station at the intersection of both pathways. The secretory pathway  
77 starts with the delivery of newly synthesized proteins and lipids from the endoplasmic  
78 reticulum (ER) to the Golgi apparatus (Dancourt and Barlowe, 2010; Lord *et al.*, 2013).  
79 Golgi-resident proteins are retained there, while secretory cargo proteins are delivered  
80 to the plasma membrane and lysosomal enzymes are sorted towards the endosomal  
81 system (De Matteis and Luini, 2008; Guo *et al.*, 2014; Kim and Gadila, 2016). In  
82 contrast, endocytosis starts with the uptake of proteins and lipids from the plasma  
83 membrane which are then sorted in endosomes for recycling or degradation in  
84 lysosomes (Pelham, 2002; Doherty and McMahon, 2009). The endosomal recycling  
85 pathway leads to the delivery of vesicles from endosomes to the Golgi apparatus  
86 (Lewis *et al.*, 2000; MacDonald and Piper, 2017). In addition, a direct recycling pathway  
87 from the plasma membrane to the Golgi apparatus has been suggested in *S. cerevisiae*  
88 (Day *et al.*, 2018; Eising *et al.*, 2019).

89 In yeast the Golgi-associated retrograde protein trafficking (GARP) complex has been  
90 identified as an important factor for the transport of cargo from endosomes to the Golgi  
91 apparatus and potentially from the plasma membrane to the Golgi apparatus (Conibear  
92 and Stevens, 2000; Eising *et al.*, 2019). GARP is a hetero-tetrameric complex  
93 consisting of the four subunits Vps51, Vps52, Vps53 and Vps54 (Conibear and  
94 Stevens, 2000, 2003). Structurally GARP belongs to the family of complexes  
95 associated with tethering containing helical rods (CATCHR; Vasan *et al.*, 2010; Chou

96 *et al.*, 2016). This multi-subunit family of protein complexes is associated with tethering  
97 of endosomal transport carriers. The GARP complex is recruited to the Golgi apparatus  
98 by the Rab GTPase Ypt6 and interacts with the SNARE (soluble N-ethylmaleimide-  
99 sensitive-factor attachment receptor) protein Tgl1 via its Vps51 subunit (Siniosoglou  
100 and Pelham, 2001; Conibear and Stevens, 2003). The GARP complex has been linked  
101 to a multitude of intracellular processes. Besides its canonical role in sorting the  
102 carboxypeptidase Y (CPY) receptor Vps10, the GARP complex is important for  
103 sphingolipid homeostasis, autophagy, mitochondrial tubulation, and vacuolar integrity  
104 (Conibear and Stevens, 2000; Reggiori and Klionsky, 2006; Fröhlich *et al.*, 2015; Yang  
105 and Rosenwald, 2016).

106 Regardless of its involvement in many cellular processes, regulation of the GARP  
107 complex or of its subunits by post-translational modifications has not been described.  
108 However, previous studies have identified different phosphorylation sites on subunits  
109 of the GARP complex (Gnad *et al.*, 2009; Braun *et al.*, 2014; Fröhlich *et al.*, 2016).  
110 Based on results showing differential phosphorylation after sphingolipid depletion, we  
111 decided to characterize a phosphorylation site in the carboxy-terminus of the GARP  
112 subunit Vps53.

113 Here, we use a combination of sequence prediction, mass spectrometry-based  
114 proteomics, and *in vitro* kinase assays to identify the yeast AMP kinase homolog Snf1  
115 as a regulator of Vps53. We demonstrate that Vps53 phosphorylation does not affect  
116 the canonical endosomal recycling pathway mediated by GARP. Using mass  
117 spectrometry-based proteomics and live cell imaging, we describe an unexpected role  
118 for Vps53 phosphorylation in mitochondrial dynamics which is mediated by the  
119 formation of a previously unknown membrane contact site formed between the Golgi  
120 apparatus and mitochondria.

121

## 122 **Results**

### 123 **Vps53 is phosphorylated by Snf1 at position 790 *in vivo***

124 We and others have previously identified phosphorylated residues on subunits of the  
125 GARP complex (Gnad *et al.*, 2009; Braun *et al.*, 2014; Fröhlich *et al.*, 2016). Given the  
126 essential nature of GARP in endo-lysosomal trafficking and sphingolipid homeostasis,  
127 we decided to test if phosphorylation is a potential regulatory mechanism. Especially

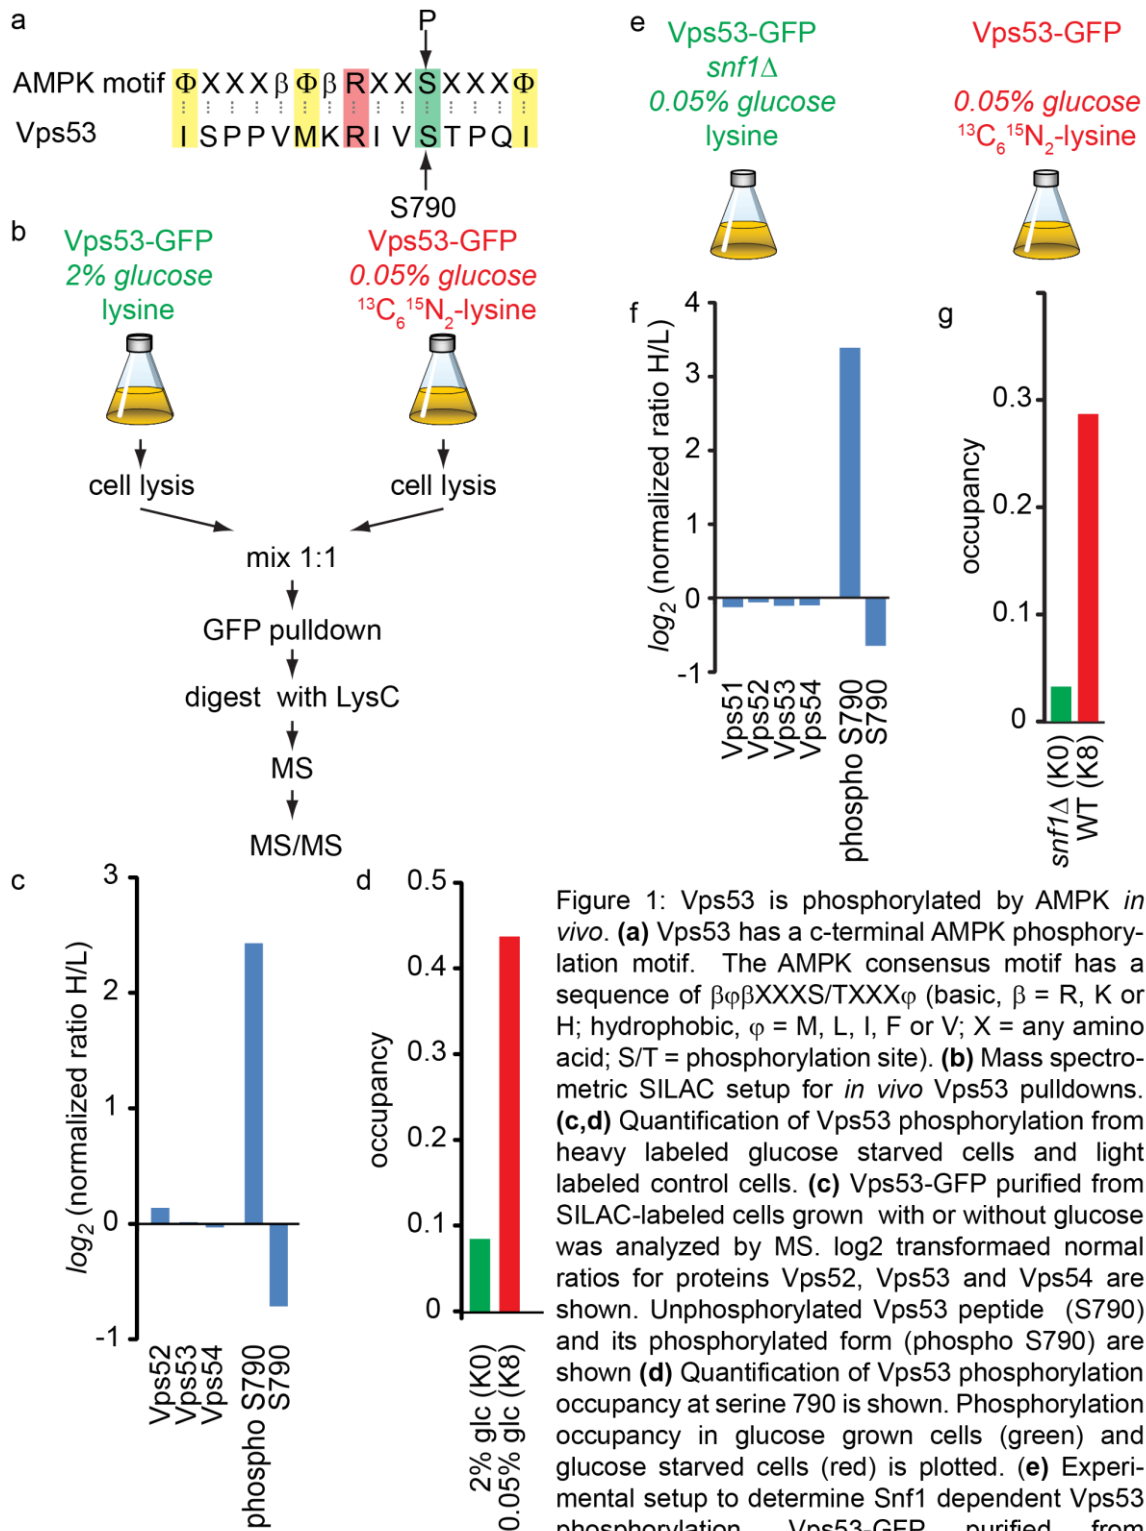

Figure 1: Vps53 is phosphorylated by AMPK *in vivo*. **(a)** Vps53 has a c-terminal AMPK phosphorylation motif. The AMPK consensus motif has a sequence of  $\beta\phi\beta$ XXXS/TXXX $\phi$  (basic,  $\beta$  = R, K or H; hydrophobic,  $\phi$  = M, L, I, F or V; X = any amino acid; S/T = phosphorylation site). **(b)** Mass spectrometric SILAC setup for *in vivo* Vps53 pull-downs. **(c,d)** Quantification of Vps53 phosphorylation from heavy labeled glucose starved cells and light labeled control cells. **(c)** Vps53-GFP purified from SILAC-labeled cells grown with or without glucose was analyzed by MS.  $\log_2$  transformed normal ratios for proteins Vps52, Vps53 and Vps54 are shown. Unphosphorylated Vps53 peptide (S790) and its phosphorylated form (phospho S790) are shown **(d)** Quantification of Vps53 phosphorylation occupancy at serine 790 is shown. Phosphorylation occupancy in glucose grown cells (green) and glucose starved cells (red) is plotted. **(e)** Experimental setup to determine Snf1 dependent Vps53 phosphorylation. Vps53-GFP purified from SILAC-labeled *snf1* $\Delta$  (light) or WT cells (heavy) grown without glucose was analyzed by MS. **(f)** Quantification of Vps53 phosphorylation occupancy at serine 790 is shown. Phosphorylation occupancy in *snf1* $\Delta$  cells (green) and WT cells (red) is plotted. **(g)** Quantification of Vps53 phosphorylation occupancy at serine 790 is shown. Phosphorylation occupancy in *snf1* $\Delta$  cells (green) and WT cells (red) is plotted.

129 the Vps53 subunit has been shown multiple times to be phosphorylated at serine  
130 residue 790. This residue is located at the very c-terminus of Vps53 which is  
131 functionally accessible to kinases and is important for the function of Vps53 (Vasan *et al.*,  
132 *et al.*, 2010; Chou *et al.*, 2016).

133 Therefore, we first analyzed the amino acid sequence surrounding serine 790 in the  
134 Vps53 subunit of GARP. Carrying an arginine residue in the -3 position as well as  
135 hydrophobic residues in the -10, -5 and +4 position, it strongly resembles a classical  
136 motif for AMP activated protein kinase (AMPK) or its homolog Snf1 in *S. cerevisiae*  
137 (Dale *et al.*, 1995; Hardie, 2007) (Fig. 1a). In yeast, Snf1 is not activated by adenosine  
138 monophosphate (AMP) levels but is repressed by glucose (Jiang and Carlson, 1996;  
139 Wilson *et al.*, 1996). Depletion of glucose from the growth medium therefore results in  
140 increased Snf1 activity. We used stable isotope labeling by amino acids in cell culture  
141 (SILAC; Ong *et al.*, 2002) combined with affinity purification and mass spectrometry  
142 based proteomics to determine if Vps53 phosphorylation was dependent on Snf1 (Fig.  
143 1b). Affinity purification of Vps53 from cells labeled with lysine (K0), grown in 2%  
144 glucose compared to  $^{13}\text{C}_6^{15}\text{N}_2$ -lysine (K8) labeled cells grown for 15 minutes in the  
145 presence of 0.02% glucose resulted in the identification of the three GARP subunits  
146 Vps52, Vps53 and Vps54. The heavy/light ratio of the three purified proteins was close  
147 to 1, suggesting that glucose depletion in the medium neither changed the abundance  
148 of the proteins in the cell nor their assembly into the GARP complex (Fig. 1c). In  
149 contrast, the peptide of Vps53 carrying a phosphorylated serine at position 790 (S790)  
150 showed a high heavy/light ratio, while the corresponding non-phosphorylated peptide  
151 showed a ratio smaller than 1 (Fig. 1c). The acquired data even allowed us to calculate  
152 that Vps53 phosphorylation occupancy at serine 790 increased from ~ 10% in glucose  
153 grown cells to approximately 45% in glucose depleted cells (Fig. 1d). Together, these  
154 results indicate that Vps53 is phosphorylated upon glucose deprivation.

155 To test if this phosphorylation is indeed depending on Snf1, we affinity purified Vps53-  
156 GFP from lysine labelled *snf1Δ* cells and from  $^{13}\text{C}_6^{15}\text{N}_2$ -lysine labelled WT cells, both  
157 grown for 15 min in the presence of 0.02% glucose (Fig. 1e). In these experiments we  
158 were able to co-purify all four subunits of the GARP complex, Vps51, Vps52, Vps53  
159 and Vps54. None of the above showed a difference in total protein levels, suggesting  
160 that the abundance of the proteins as well as the formation of the complex does not  
161 depend on Snf1 (Fig. 1f). However, we observed a high heavy/light ratio for the

162 phosphorylated Vps53 peptide including serine 790 with a concomitant low ratio of the  
163 non-phosphorylated peptide (Fig. 1f). We calculated the amount of phosphorylated  
164 Vps53 in *snf1Δ* cells to be 2% (which is likely an overestimate, see material and  
165 methods) and approximately 30% in WT cells (Fig. 1 e).

166 In a previous study we have identified a decrease in Vps53 phosphorylation at position  
167 790 upon chemical inhibition of sphingolipid biosynthesis with myriocin (Fröhlich *et al.*,  
168 2016). Our results indicate that Vps53 phosphorylation is very low under standard  
169 growth conditions. Therefore, a myriocin dependent reduction probably reflects minor  
170 changes. However, we tested Snf1 phosphorylation upon myriocin treatment, glucose  
171 starvation and a combination of both treatments by western blotting. As expected,  
172 myriocin dependent sphingolipid depletion had only minor effects on basal Snf1 activity  
173 based on phosphorylation of threonine residue 210. A combination of myriocin  
174 treatment and glucose starvation led to a delayed decrease of Snf1 activity (suppl. Fig.  
175 1).

176 Together, our data suggest that Vps53 is a target of the yeast AMPK homolog Snf1  
177 and is phosphorylated upon depletion of the carbon source in the growth medium.  
178 Sphingolipid depletion only shows minor effects on basal Snf1 activity.

### 179 **Vps53 is a substrate of Snf1 *in vitro***

180 To determine if Vps53 is a substrate of Snf1 *in vitro*, we first purified the C-terminal  
181 part of Vps53 (amino acids 552-882) recombinantly expressed in *E.coli* (Fig. 2a). In  
182 addition, we purified the recombinantly-expressed kinase domain of Snf1 (aa 1-392) as  
183 well as a non-activatable Snf1 catalytic domain carrying an alanine residue at position  
184 210 instead of a threonine (Fig. 2b). Snf1 is activated by phosphorylation on threonine  
185 210 by either Sak1, Tos3, or Elm1 (Hong *et al.*, 2003). To activate Snf1 *in vitro*, we  
186 purified TAP-tagged Elm1 lacking the autoinhibitory c-terminal domain (residues 421-  
187 640) from yeast cells. Incubation of Snf1 and purified Elm1 results in the  
188 phosphorylation of Snf1 at position 210 (Lee *et al.*, 2012). While *in vitro* kinase assays  
189 are usually performed in the presence of radio-labeled ATP, we decided to develop a  
190 label free mass spectrometry-based Snf1 *in vitro* kinase assay with site-specific  
191 accuracy. For this purpose, we incubated the purified C-terminus of Vps53 with either  
192 the Elm1-activated Snf1<sub>WT</sub> or kinase-dead (KD) Snf1<sub>T210A</sub> in triplicates and analyzed  
193 the resulting peptides after digestion with the endo-proteinase trypsin by mass  
194 spectrometry (Fig. 2c). This analysis resulted in the complete identification of all

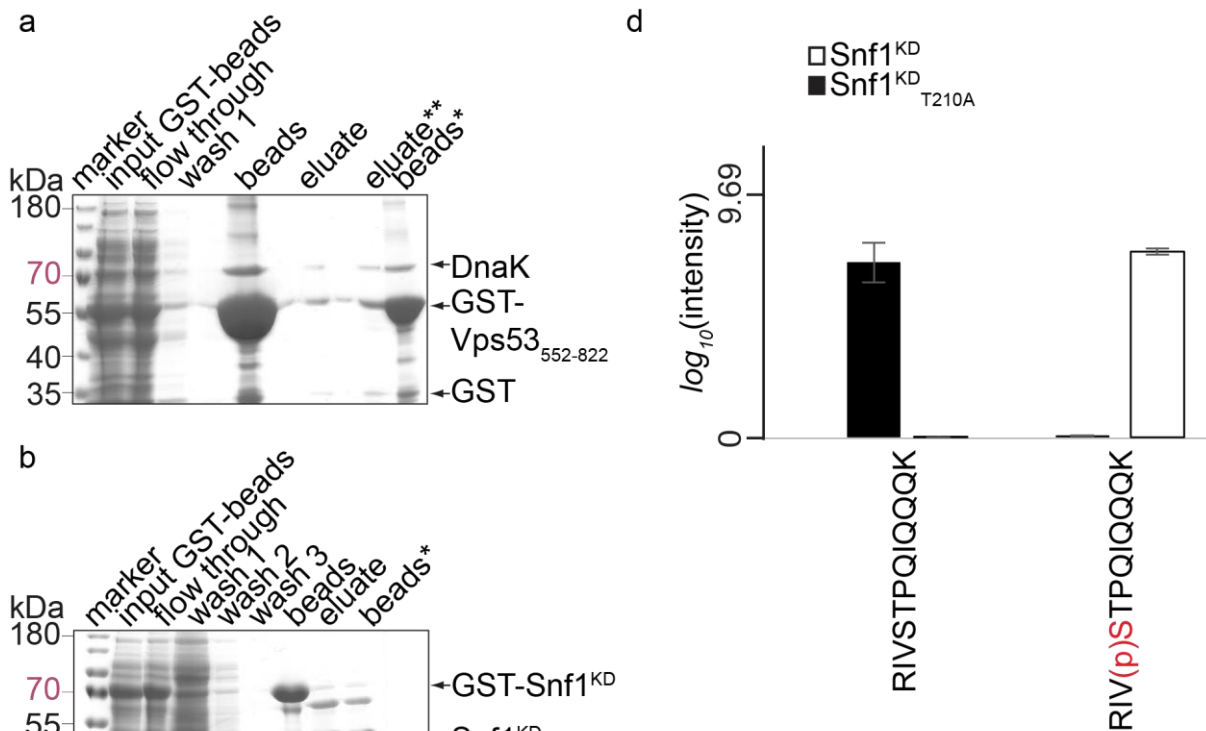

**Figure 2: Vps53 is a Snf1 substrate *in vitro***

(a,b) Overexpressed recombinant GST tagged Vps53<sub>552-822</sub> was purified from E.coli. SDS-PAGE showing the lysates and affinity purification steps. Before (beads) and after elution (beads\*) of glutathione agarose matrix, 2 % were boiled in Laemmli buffer to elute protein. 0.2 % of the lysate (input GST-beads) and lysate after affinity purification (flow through) were loaded on a 10 % SDS gel. Left lane shows the molecular weight markers (marker). (a) Recombinant Vps53<sub>552-822</sub> was twice eluted via glutathione (eluate (15 mM), eluate\*(20 mM)). 2% of the eluates were loaded. (b) GST-Snf1 kinase domain was eluted following PreScission protease digestion. eluate: eluted Snf1-KD (c) Experimental workflow of label free, mass spectrometry based *in vitro* kinase assay to determine kinase-substrate specificity of Snf1 and Vps53. (d) Vps53 is a substrate of Snf1 *in vitro*. Average peptide intensities of the Vps53 peptide RIVSTPQIQQK (left) and its phosphorylated counterpart (right) from experiments with the WT Snf1 kinase domain (white bars) or the inactive Snf1 kinase domain (black bars). Error bars represent standard deviation from three experiments.

195

196 peptides from the C-terminus of Vps53 as well as the entire kinase domain of Snf1.

197 We also detected multiple phosphorylated residues on Vps53. However, we only

198 identified the Vps53 peptide carrying the phosphorylated amino acid residue serine

199 790 (RIVpSTPQIQQK) in the presence of the activated kinase domain of Snf1 (Fig.

200



201 2d). Other phosphorylation events are therefore probably artifacts resulting from  
 202 phosphorylation by purified Elm1 or other impurities from this purification. Our  
 203 experiments clearly demonstrate that Vps53 is a substrate of Snf1, both *in vivo* and *in*  
 204 *vitro*.

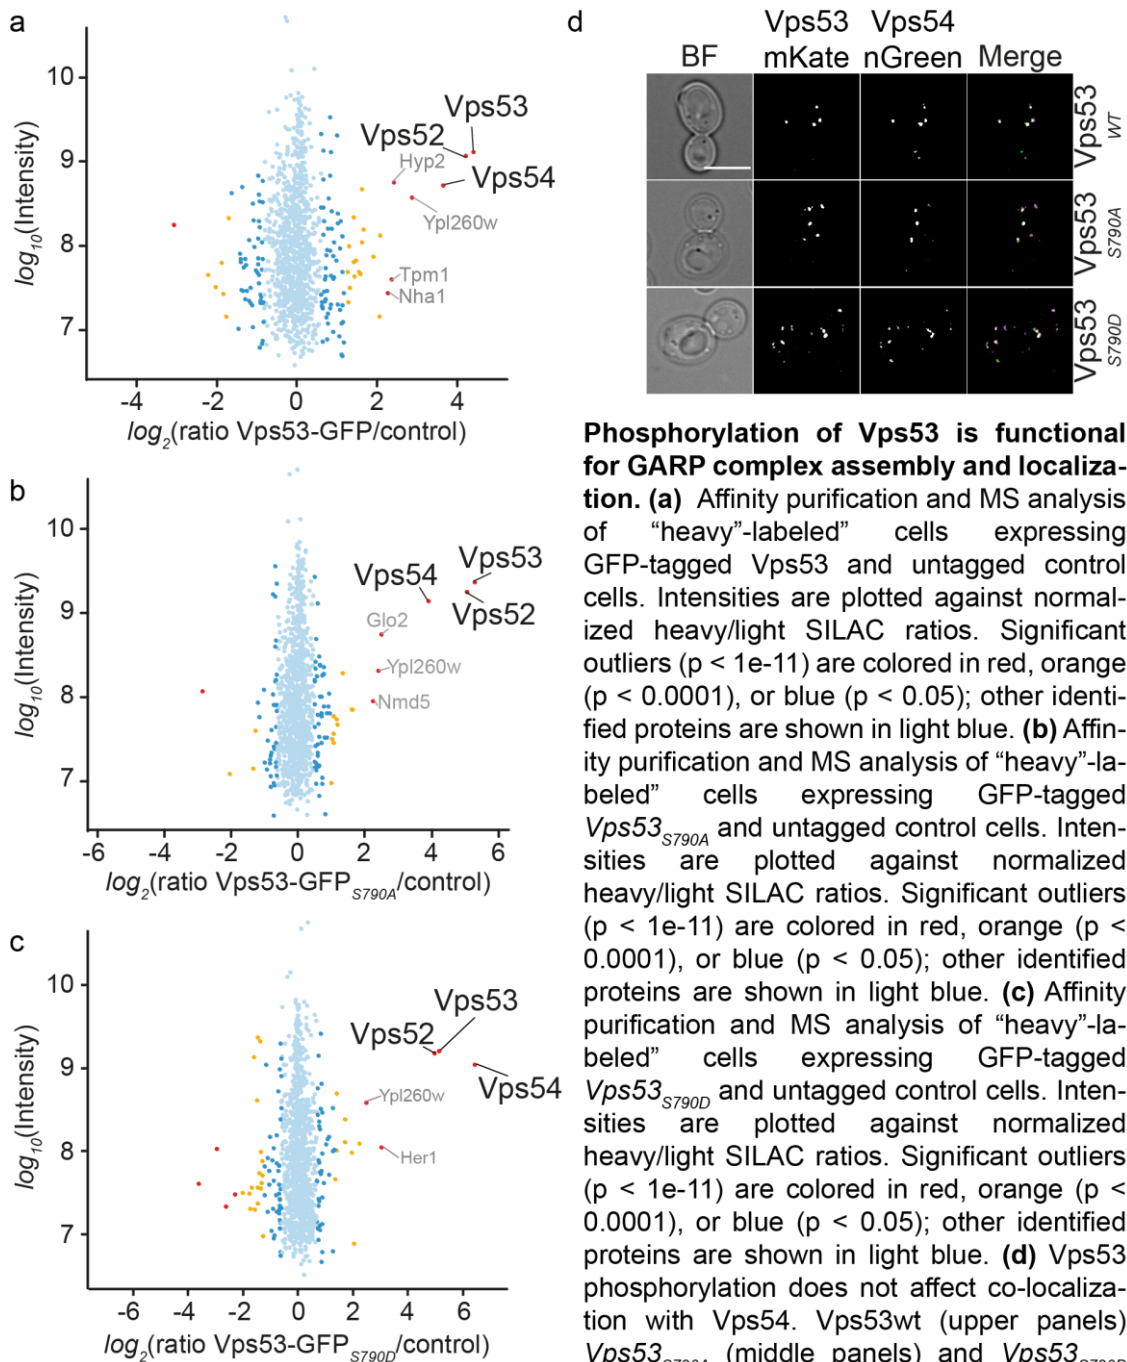

**Phosphorylation of Vps53 is functional for GARP complex assembly and localization.**

**(a)** Affinity purification and MS analysis of “heavy”-labeled cells expressing GFP-tagged Vps53 and untagged control cells. Intensities are plotted against normalized heavy/light SILAC ratios. Significant outliers ( $p < 1e-11$ ) are colored in red, orange ( $p < 0.0001$ ), or blue ( $p < 0.05$ ); other identified proteins are shown in light blue. **(b)** Affinity purification and MS analysis of “heavy”-labeled cells expressing GFP-tagged Vps53<sub>S790A</sub> and untagged control cells. Intensities are plotted against normalized heavy/light SILAC ratios. Significant outliers ( $p < 1e-11$ ) are colored in red, orange ( $p < 0.0001$ ), or blue ( $p < 0.05$ ); other identified proteins are shown in light blue. **(c)** Affinity purification and MS analysis of “heavy”-labeled cells expressing GFP-tagged Vps53<sub>S790D</sub> and untagged control cells. Intensities are plotted against normalized heavy/light SILAC ratios. Significant outliers ( $p < 1e-11$ ) are colored in red, orange ( $p < 0.0001$ ), or blue ( $p < 0.05$ ); other identified proteins are shown in light blue. **(d)** Vps53 phosphorylation does not affect co-localization with Vps54. Vps53wt (upper panels) Vps53<sub>S790A</sub> (middle panels) and Vps53<sub>S790D</sub> (lower panels) tagged with mKate (left panels) were co-localized with mNeonGreen tagged Vps54. Merged channels in the right panels. Scale bar = 5 $\mu$ M

205

206 **Phosphorylation of Vps53 is functional for GARP complex assembly and**  
 207 **localization**

208 Next, we asked which physiological function of Vps53 or the GARP complex is affected  
209 by phosphorylation of Vps53. Our analysis of the purified GARP complex showed that  
210 the assembly of the complex was unaffected by glucose limiting conditions and  
211 concomitant phosphorylation of Vps53 (Fig. 1d). To confirm these results, we  
212 generated GFP-tagged versions of Vps53, where serine 790 is exchanged to either  
213 alanine (S790A, non-phosphorylatable) or to aspartate (S790D, phospho-mimetic). We  
214 performed affinity purifications of lysine 8 labelled Vps53-GFP, *Vps53<sub>S790A</sub>*-GFP and  
215 *Vps53<sub>S790D</sub>*-GFP cells compared to lysine 0 labelled WT cells (Fig. 3a). Under the used  
216 conditions we were able to co-purify the three GARP subunits Vps52, Vps53 and  
217 Vps54 in cells expressing Vps53-GFP, *Vps53<sub>S790A</sub>*-GFP and *Vps53<sub>S790D</sub>*-GFP,  
218 confirming that the assembly of the GARP complex is unaffected by Snf1 dependent  
219 phosphorylation on serine 790 (Fig. 3b, c and d). To further confirm these results, we  
220 analyzed the localization of mKate tagged Vps53, *Vps53<sub>S790A</sub>*, and *Vps53<sub>S790D</sub>* in cells  
221 relative to Vps54 tagged with neonGreen (Fig. 3e). We did not observe changes of the  
222 localization of either Vps53 construct in comparison to the GARP subunit Vps54 (Fig.  
223 3e). Together, our results show that phosphorylation of Vps53 does not affect GARP  
224 complex assembly or localization.

### 225 **Carbon source dependent phosphorylation of Vps53 is functional for the CPY** 226 **trafficking pathway**

227 Next, we asked if the canonical function of the GARP complex in CPY trafficking is  
228 affected by the phosphorylation state of Vps53. Therefore, we used a CPY secretion  
229 assay based on a CPY-invertase fusion protein, which allows secretion to be quantified  
230 by a colorimetric assay (Robinson *et al.*, 1988; Darsow *et al.*, 2000; Bean *et al.*, 2017).  
231 Since this assay detects glucose levels resulting from the hydrolysis of sucrose into  
232 fructose and glucose, we had to adjust our growth conditions. For conditions, where  
233 Snf1 is inactive and thus Vps53 is non-phosphorylated, we grew cells in the presence  
234 of 2% fructose. For Snf1 activating conditions we switched cells to 2% lactate as this  
235 had been reported to activate Snf1 (Defenouillère *et al.*, 2019). We tested CPY  
236 secretion in *vps53Δ* cells expressing a Vps53 WT version, the non-phosphorylatable  
237 *Vps53<sub>S790A</sub>* or the phosphomimetic *Vps53<sub>S790D</sub>* mutant as the sole Vps53 copy from a  
238 plasmid. We detected a small increase in CPY secretion based on invertase activity in  
239 lactate grown cells compared to fructose grown cells. However, we could not observe  
240 major differences in the two phospho-mutants compared to WT cells (Fig. 4a). In

241 addition, the levels of CPY secretion were at least ten times lower than in *vps53Δ* cells

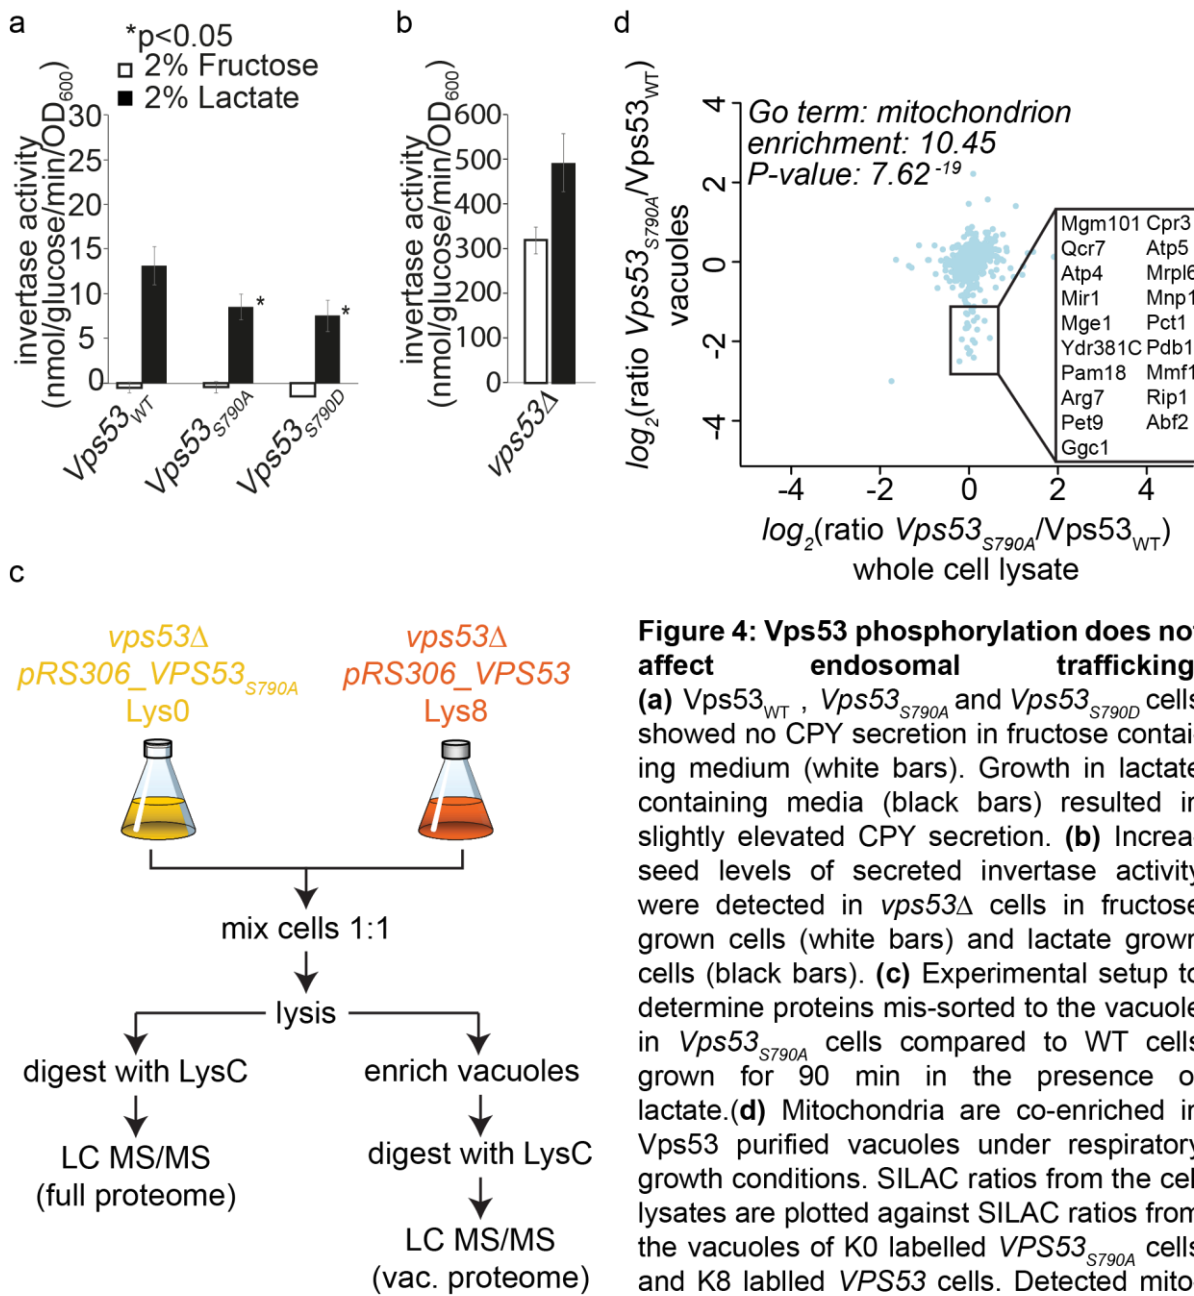

**Figure 4: Vps53 phosphorylation does not affect endosomal trafficking.**

(a) *Vps53*<sub>WT</sub>, *Vps53*<sub>S790A</sub> and *Vps53*<sub>S790D</sub> cells showed no CPY secretion in fructose containing medium (white bars). Growth in lactate containing media (black bars) resulted in slightly elevated CPY secretion. (b) Increased levels of secreted invertase activity were detected in *vps53Δ* cells in fructose grown cells (white bars) and lactate grown cells (black bars). (c) Experimental setup to determine proteins mis-sorted to the vacuole in *Vps53*<sub>S790A</sub> cells compared to WT cells grown for 90 min in the presence of lactate. (d) Mitochondria are co-enriched in *Vps53* purified vacuoles under respiratory growth conditions. SILAC ratios from the cell lysates are plotted against SILAC ratios from the vacuoles of K0 labelled *VPS53*<sub>S790A</sub> cells and K8 labelled *VPS53* cells. Detected mitochondrial protein-levels are decreased in *VPS53*<sub>S790A</sub> purified vacuoles compared to

WT. Enriched GO term were identified with the Gene Ontology enRichment anaLysis and visu-aLizAtion tool, GOrilla.

242

243 not expressing a copy of *Vps53* (Fig. 4b). Thus, we conclude that the canonical GARP  
 244 dependent CPY trafficking pathway is not regulated by carbon source and *Vps53*  
 245 phosphorylation by Snf1.

246 In addition to its canonical function in *Vps10* recycling and the CPY pathway, we have  
 247 recently shown that the induced depletion of *Vps53*, and thus the GARP complex,  
 248 results in the re-localization of several plasma membrane proteins to the vacuole

249 (Eising *et al.*, 2019). We hypothesized that we can identify any cargo whose transport  
250 to the vacuole depends on Vps53 phosphorylation using this assay. We therefore  
251 purified vacuoles from lysine 8 labelled *VPS53<sub>S790A</sub>* cells and light lysine labelled WT  
252 cells and compared their proteomes by mass spectrometry. To account for differences  
253 in protein abundance we also analyzed the total proteome of these cells. In addition,  
254 we switched cells from glucose containing medium to lactate containing medium for 90  
255 minutes (Fig. 4c). We assumed that only Vps53 from WT cells is phosphorylated under  
256 these conditions and also kept conditions comparable to the CPY secretion assay.  
257 When we plotted normalized ratios of proteins from the entire cell lysate against the  
258 ratios from vacuole isolations we identified a group of proteins that are specifically  
259 depleted in vacuole isolations of *VPS53<sub>S790A</sub>* cells (Fig. 4d). We did not identify any  
260 cargo from the endo-lysosomal pathway (e.g. Vps10, Prc1, Dnf1, Lem3). In contrast,  
261 the group of specifically depleted proteins are almost exclusively mitochondrial  
262 proteins, based on GO term enrichments (Fig. 4d and supplementary table 1). The  
263 identified mitochondrial proteins were not specific for any mitochondrial compartment  
264 (outer membrane, inner membrane, matrix), suggesting that intact mitochondria co-  
265 purified with vacuoles in WT cells and that this co-purification is diminished in  
266 *VPS53<sub>S790A</sub>* cells (Fig. 4d and supplementary table 1).

### 267 **Phosphorylation of Vps53 affects mitochondrial dynamics and morphology**

268 To uncover the mechanistic basis of decreased mitochondrial co-purification in  
269 *Vps53<sub>S790A</sub>* cells we analyzed mitochondrial morphology under both, fermentative and  
270 respiratory growth conditions. First we defined three different mitochondrial  
271 phenotypes in cells, tubulated, intermediate or fragmented based on mito-GFP  
272 fluorescence (Fig. 5a; Rambold *et al.*, 2011; Aung-Htut *et al.*, 2013). Similarly to  
273 previous studies, about 80% of cells expressing a WT copy of Vps53 had tubulated  
274 mitochondria when grown in glucose (Wong *et al.*, 2000). This number similar in  
275 *Vps53<sub>S790D</sub>* cells and slightly reduced to approximately 60% in *VPS53<sub>S790A</sub>* expressing  
276 cells with a concomitant increase in mitochondria showing an intermediate morphology  
277 (Fig. 5a, black bars). Switching cells to lactate for 90 min resulted in mitochondrial  
278 fragmentation in 60% of *VPS53<sub>S790A</sub>* cells. In contrast, only 30% of *VPS53* and  
279 *VPS53<sub>S790D</sub>* expressing cells showed this phenotype (Fig. 5a, black bars). Similar  
280 results were obtained for *Vps53<sub>S790A</sub>* expressing cells that were glucose starved (suppl.  
281 Fig. 2). Together, these results show that mitochondrial dynamics are changed in cells  
282 expressing a non-phosphorylatable mutant of Vps53 grown in the presence of lactate.

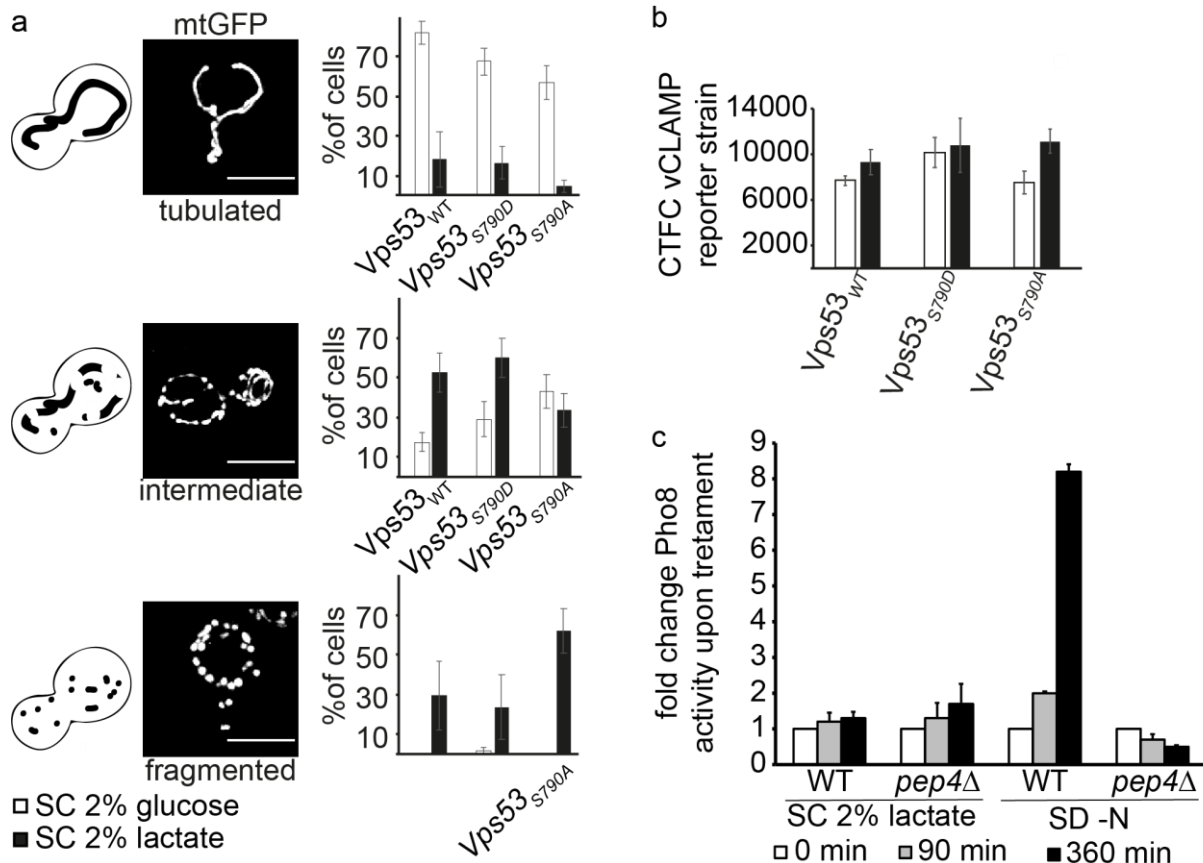

**Figure 5: Vps53 phosphorylation causes mitochondrial phenotypes.** (a) Vps53 phosphorylation affects mitochondrial morphology. Mitochondria were visualized with mtGFP in *vps53Δ* cells expressing *VPS53*, *VPS53<sub>S790A</sub>* and *VPS53<sub>S790D</sub>* from plasmids. Exponentially growing cells were shifted to media with 2% lactate as a non-fermentable carbon source. Live images were acquired after 90 min (Scale bar 5 μm). Mitochondrial morphology was classified as follows: fragmented, mainly small and spherical; intermediate, mixture spherical and shorter tubulated; and tubulated, interconnective and elongated. Quantification of the indicated mitochondrial morphology was determined as percentage of the total number of counted cells. Cells grown in SDC showed the dominant phenotype of tubulated mitochondria that shifts to intermediate and fragmented structures during respiratory growth condition. *VPS53<sub>S790A</sub>* cells (~70%) show a higher rate of fragmentation compared to WT and *VPS53<sub>S790D</sub>* cells. *VPS53<sub>S790D</sub>* and WT cells have comparable phenotypes. Approximately 58% of WT and ~65% *VPS53<sub>S790D</sub>* cells show intermediate morphological structure and slightly increased levels of fragmentation during respiratory growth. Error bars represent the average of three independent experiments (150 ≥ cells). (b) A vCLAMP reporter consisting of the VN tagged mitochondrial membrane protein Tom70 and the vacuolar Zrc1 tagged with the complementary split Venus half. *vps53Δ* cells were complemented with plasmids containing either the WT or *VPS53<sub>S790A</sub>* and *VPS53<sub>S790D</sub>* mutants. *VPS53<sub>wt</sub>* was grown to mid-log phase and shifted to lactate containing media for 90 min and imaged. The corrected total cell fluorescence (CTCF) was measured for each cell. CTCF values for respiratory growth conditions (black bars) and control (white bars) are given as means with standard deviation (n = 3). (c) Growth on lactate as a sole carbon source does not induce mitophagy. WT and *pep4Δ* strains expressing the mitophagy reporter *mito-pho8Δ60* were subjected to respiratory growth conditions (SC-0.5% lactate) or nitrogen starvation (SD-N) for the times indicated. The fold change of specific *mito-pho8Δ60* activity relative to glucose-grown control cells is given as mean ± s.d. (n = 3). Only nitrogen starvation induced *mito-pho8Δ60* activity in a *PEP4*-dependent.

283

284 Co-purification of mitochondria and vacuoles depends on the formation of a contact

285 site between the two organelles (vCLAMP, vacuolar and mitochondrial patch, Elbaz-

286 Alon *et al.*, 2014; Hönscher *et al.*, 2014). Since mitochondria appeared to be more  
287 fragmented in *VPS53<sub>S790A</sub>* cells growing in lactate, we hypothesized that the number  
288 of vCLAMPs remained constant under these conditions. To test this, we used the  
289 established vCLAMP sensor strain. The vCLAMP split-Venus fluorescent reporter  
290 strain contains the N-terminus of the Venus fluorescent protein fused to the  
291 transmembrane protein Tom70, a subunit of the TOM complex, and the C-terminus of  
292 Venus fused to Zrc1, a zinc channel of the vacuole membrane (González Montoro *et*  
293 *al.*, 2018). We first quantified total cellular fluorescence of the reporter in *Vps53*,  
294 *Vps53<sub>S790A</sub>* and *Vps53<sub>S790D</sub>* grown in the presence of glucose. Under these conditions,  
295 we did not detect any significant changes in the abundance of vCLAMP signals (Fig.  
296 5b, white bars). Previous studies determined a decrease of vCLAMPs after 26h  
297 exposure to respiratory growth conditions (Hönscher *et al.*, 2014). In contrast, in cells  
298 grown 90 minutes in the presence of lactate we detected a slight increase in vCLAMP  
299 signals in cells carrying the *VPS53<sub>S790A</sub>* allele (Fig. 5b, black bars). A constant number  
300 of vCLAMPs in lactate growing cells together with a higher degree of mitochondrial  
301 fragmentation explains the decreased amount of mitochondrial proteins identified in  
302 our SILAC purification of vacuoles from *Vps53<sub>S790A</sub>* cells.

303 It was previously shown that prolonged growth of yeast cells in lactate can induce  
304 mitophagy (Kanki *et al.*, 2009). To rule out diminished mitophagy as the cause for  
305 decreased co-purification of mitochondria in our vacuole purifications we directly  
306 analyzed mitophagy under our growth conditions. Therefore, we generated strains, in  
307 which the autoinhibited phosphatase Pho8 $\Delta$ 60 is targeted to mitochondria. When mito-  
308 Pho8 $\Delta$ 60 reaches the vacuole as a result of autophagy, its inhibitory pro-peptide is  
309 cleaved off in a Pep4-dependent manner and its phosphatase activity is unmasked,  
310 allowing quantitative assessment of mitophagy (Campbell and Thorsness, 1998;  
311 Schuck *et al.*, 2014). We switched yeast cells from glucose-containing medium to  
312 lactate-containing medium for up to 6 h to potentially activate mitophagy. However, we  
313 could not detect induction of mitophagy (Fig. 5c, left part). In contrast, mito-Pho8 $\Delta$ 60  
314 activity was strongly induced in WT but not in *pep4 $\Delta$*  cells when autophagy was  
315 triggered by nitrogen starvation, demonstrating functionality of the assay (Fig. 5c, right  
316 part Kanki *et al.*, 2009). Our measurements show that autophagy is not occurring in  
317 our culture conditions, excluding the hypothesis that the decreased presence of  
318 mitochondrial proteins in *Vps53<sub>S790A</sub>* vacuoles is due to an impaired autophagy.

319

## 320 **Phosphorylation of Vps53 affects Golgi mitochondria proximity**

321 How does Vps53 phosphorylation affect mitochondrial morphology? When we  
322 analyzed the co-localization of Vps53 with a Golgi marker (sec7-mKate) and mito-BFP,  
323 we observed partial co-localization of these structures in *Vps53<sub>S790D</sub>* expressing cells  
324 grown in the presence of glucose (Fig. 6a). Interestingly, shifting Vps53-GFP cells to  
325 lactate containing medium also led to close proximity of the Golgi apparatus and  
326 mitochondria (Fig. 6b). We therefore asked whether Vps53 could be involved in the  
327 formation of a contact site between the Golgi apparatus and mitochondria. To test this,  
328 we used an assay based on a fluorescence reporter strain that monitors the extent of  
329 organelle proximity by split-Venus complementation (Shai *et al.*, 2018). When one half  
330 of the split Venus system was fused to Tom70 and the other half to Vps53 we detected  
331 robust fluorescent signals with an average of three structures per cell in glucose grown  
332 cells. In comparison, *Vps53<sub>S790A</sub>* expressing cells also showed signals, but the amount  
333 of cells without a signal was higher. *Vps53<sub>S790D</sub>* expressing cells showed higher signal  
334 with an average of seven structures per cell and no cells without any signal (Fig. 6c  
335 and d). When we switched cells to lactate containing medium for 90 minutes, we  
336 observed an increase of fluorescent signal in WT cells. The signal in both phospho-  
337 mutants of Vps53 remained constant, suggesting that the formation of the contact site  
338 is indeed depending on the phosphorylation status of Vps53 (Fig. 6e and f). If the  
339 formation of a contact site between the Golgi apparatus and mitochondria is dependent  
340 on the phosphorylation of Vps53, we expected to detect proximity of the Golgi  
341 apparatus and mitochondria based on a different set of organelle markers. We  
342 therefore fused the C-terminal half of split Venus to the trans-Golgi marker Sec7 and  
343 the N-terminal half to the mitochondrial marker Tom70. In cells expressing a WT copy  
344 of Vps53 we detected a signal in about 75% of the cells with an average of two  
345 structures per cell. When *Vps53<sub>S790A</sub>* was expressed we failed to detect any signal (Fig.  
346 6g and h). In contrast, *Vps53<sub>S790D</sub>* expressing cells had on average four fluorescent  
347 structures and signal was detectable in 100% of the cells. Switching cells to lactate  
348 containing medium increased signal levels in WT cells, while the signal in both  
349 phospho-mutants remained constant (Fig. 6i and j). Interestingly, deletion of the

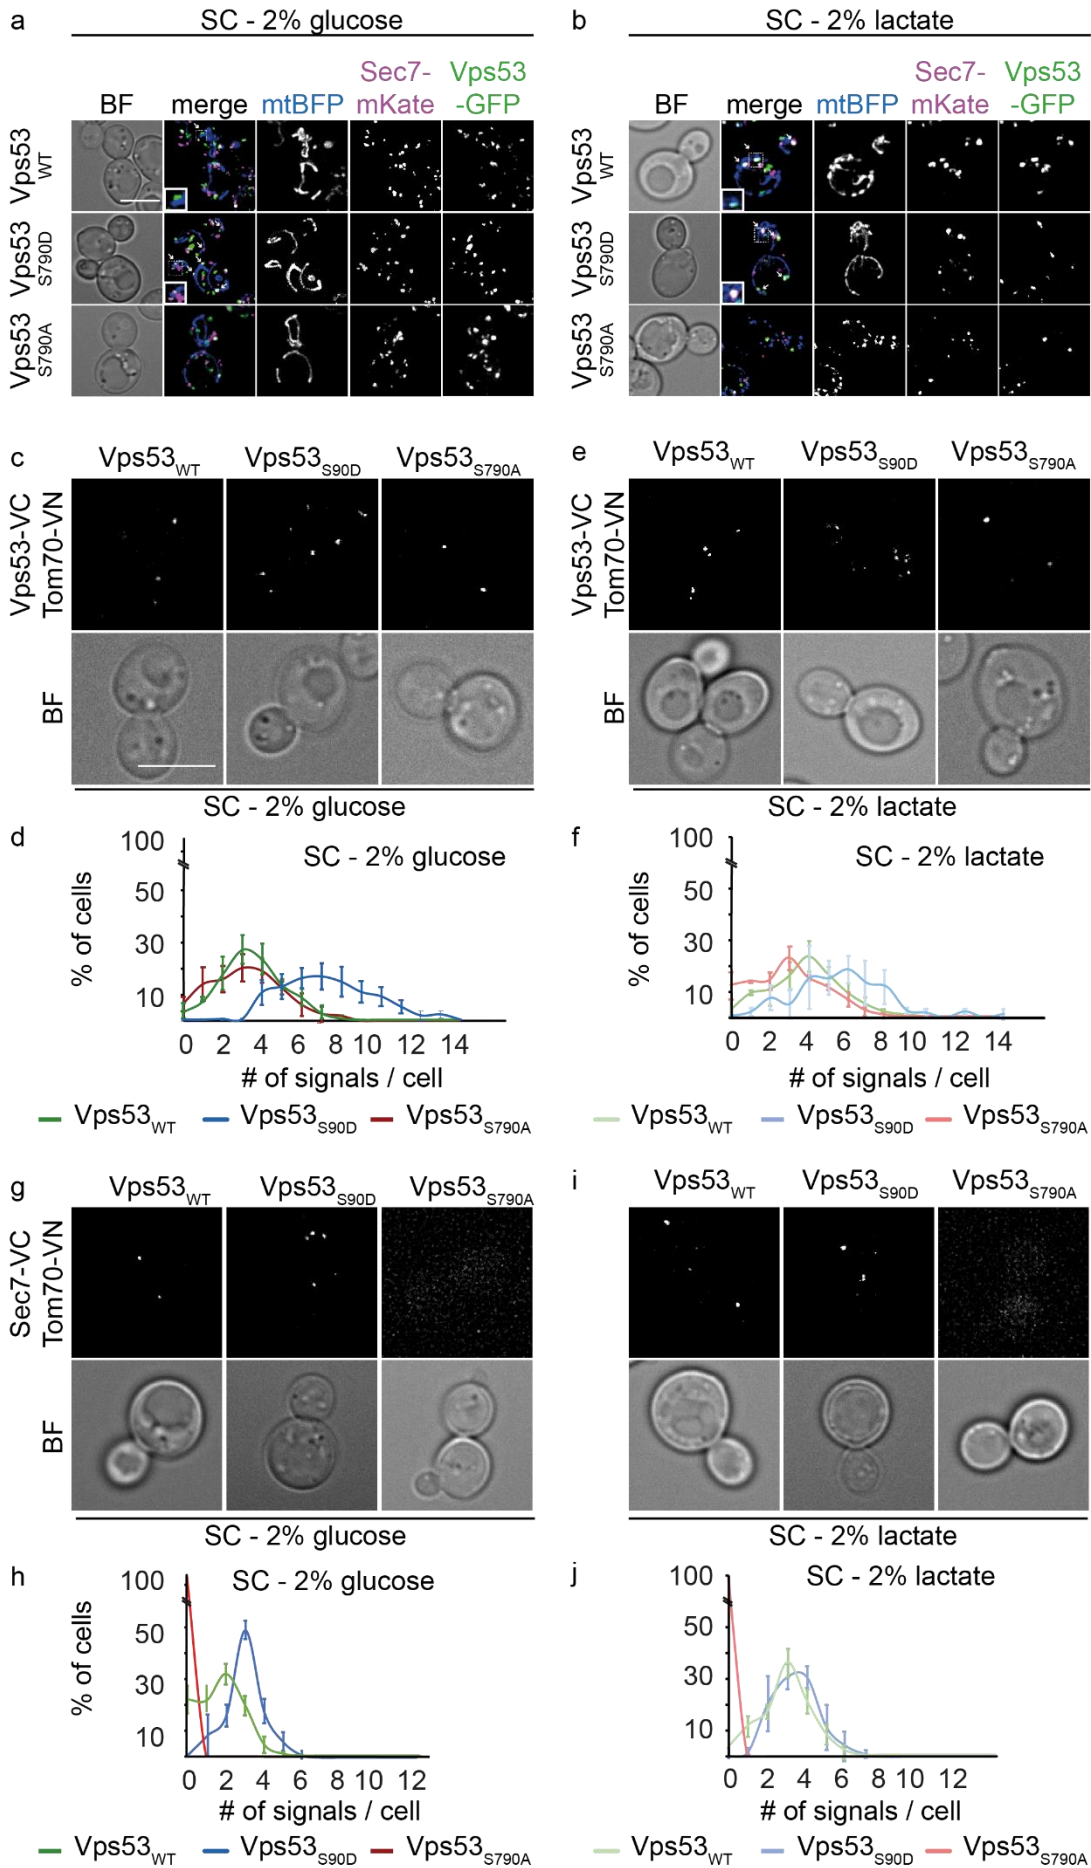



**Figure 6: Vps53 controls the formation of a Golgi-Mitochondria contact site. (a,b)** Vps53-GFP colocalizes with the mitochondrial marker mtBFP and the trans Golgi marker Sec7. Subcellular localization of the GFP tagged Vps53 and phospho-mutant variants (green) was analyzed in cells co-expressing the mitochondrial marker mtBFP (blue) and the mKate tagged trans Golgi marker Sec7 (magenta). Cells were grown to mid-log phase and shifted for 90 min in lactate containing medium and imaged to assess co-localization (Scale bar 5  $\mu$ m). Colocalization of Sec7-mKate and Vps53-GFP variants was not affected either in SC-D media (a) or under respiratory growth (b) conditions (SC 2% lac.). Lactate treatment leads to re-localization of Vps53-GFP foci to mitochondria. Arrowheads indicate co-localization of Vps53-GFP variants with mitochondria and Sec7-mKate. Magnification of co-localization (boxed region) are shown on the left corner of the merged image. **(c)** Analysis of the proximity of Vps53 with mitochondria. Cells expressing the mitochondrial membrane protein Tom-70 tagged with one half of the split Venus protein together with either Vps53, Vps53<sub>S790A</sub>, Vps53<sub>S790D</sub> expressing the complementary half of split venus were grown in the presence of glucose. Scale bar = 5 $\mu$ M **(d)** Quantification of the observed spots per cell from **(c)**. **(e)** Cells expressing the mitochondrial membrane protein Tom-70 tagged with one half of the split Venus protein together with either Vps53<sub>WT</sub>, Vps53<sub>S790A</sub>, Vps53<sub>S790D</sub> were grown for 90 min in the presence of lactate. Scale bar = 5 $\mu$ M **(f)** Quantification of the observed spots per cell from **(e)**. The average number of signals per cell increases only in Vps53<sub>WT</sub> expressing cells and stays constant in Vps53<sub>S790A</sub> and Vps53<sub>S790D</sub> expressing cells. **(g)** Analysis of the proximity of the Golgi with mitochondria. Cells expressing the mitochondrial membrane protein Tom-70 tagged with one half of the split Venus protein together with the Golgi marker Sec7 expressing the complementary half of split venus were grown in the presence of glucose. Vps53<sub>WT</sub> (left panel), Vps53<sub>S790D</sub> (middle panel), Vps53<sub>S790A</sub> (right panel) were co-expressed in the cells. Scale bar = 5 $\mu$ M **(h)** Quantification of the observed spots per cell from **(g)**. **(i)** Cells expressing the mitochondrial membrane protein Tom-70 tagged with one half of the split Venus protein together with the Golgi marker Sec7 expressing the complementary half of split venus were grown for 90 min in the presence of lactate. Vps53<sub>WT</sub> (left panel), Vps53<sub>S790D</sub> (middle panel), Vps53<sub>S790A</sub> (right panel) were co-expressed in the cells. Scale bar = 5 $\mu$ M. **(j)** Quantification of the observed spots per cell from **(i)**. The average number of signals per cell increases only in Vps53<sub>WT</sub> expressing cells and stays constant in Vps53<sub>S790A</sub> and Vps53<sub>S790D</sub> expressing cells.

351

352 recruiter Rab of the GARP complex, Ypt6, increases the formation of contact sites  
353 (suppl. Fig. 3), which most likely is caused by a dispersal of the Golgi complex the  
354 YPT6 knockout (Conibear and Stevens, 2003). Together, our results show that the  
355 formation of a contact site between the Golgi apparatus and mitochondria (GoMiCS)  
356 depends on the GARP subunit Vps53 and its phosphorylation.

357

## 358 Discussion

359 In this study we identify the Vps53 subunit of the GARP complex as a target of the  
360 yeast AMP kinase homolog Snf1. Vps53 is specifically phosphorylated at serine 790  
361 and phosphorylation depends on the availability of a carbon source (low versus high  
362 glucose) and the nature of the carbon source (glucose versus lactate). Surprisingly,  
363 Vps53 phosphorylation does not affect GARP complex assembly or any trafficking

364 pathway, but instead affects mitochondrial dynamics. We propose that this phenotype  
365 is caused by the lack of the formation of a novel, previously unrecognized membrane  
366 contact site between the Golgi apparatus and mitochondria, that we name GoMiCS  
367 (for Golgi-Mitochondria Contact Site).

368 The phosphorylation site on Vps53 is at the very C-terminal end of the protein. Based  
369 on the crystal structure of the C-terminal fragment of Vps53, this site is in a disordered  
370 region of the protein (Vasan *et al.*, 2010). The C-terminal part of Vps53 folds into two  
371 adjacent helical bundles, one formed by  $\alpha$ -helices 1 to 3 and a second one formed by  
372 the  $\alpha$ -helices 4 to 9. The identified phosphorylation site on serine 790 is located close  
373 to the end of the ninth  $\alpha$ -helix at position 778. Based on the cryo-EM structure of the  
374 intact GARP complex, the C-terminus of Vps53 is distant from the core where all four  
375 subunits interact with each other (Chou *et al.*, 2016). Thus, the phosphorylated region  
376 of Vps53 appears to be accessible to the Snf1 kinase. Additionally, based on the  
377 overall subunit architecture of the complex, it is unlikely that phosphorylation of Vps53  
378 affects the overall formation of GARP. The C-terminal part of Vps53 is also not  
379 important for the interaction with any effector proteins of GARP. The recruiter RAB of  
380 GARP is Ypt6 and this interaction was previously shown to occur between the Vps52  
381 subunit and Ypt6 (Siniosoglou *et al.*, 2000; Siniosoglou and Pelham, 2001).  
382 However, deletion of Ypt6 causes dispersion of GARP in the cells but does not diminish  
383 its association with a membrane fraction. The interaction with the SNARE protein Tlg1  
384 is mediated by the Vps51 subunit of GARP (Siniosoglou and Pelham, 2001; Conibear  
385 and Stevens, 2003).

386 Based on our results it also appears unlikely that the C-terminal part of Vps53 nor its  
387 phosphorylation is important for any known trafficking pathway in yeast. The GARP  
388 complex has been shown to be important for CPY transport based on a defect in Vps10  
389 CPY receptor recycling (Conboy and Cyert, 2000; Conibear and Stevens, 2000; Vasan  
390 *et al.*, 2010; Bonifacino and Hierro, 2011). Our analysis shows that neither the non-  
391 phosphorylatable mutant of Vps53 nor the phospho-mimetic mutant of Vps53 affect  
392 CPY trafficking. In addition, depletion of the carbon source or growth in a non-  
393 fermentable carbon source do not affect CPY trafficking in our studies. We and others  
394 have previously shown that the GARP complex is important for the recycling of several  
395 plasma membrane proteins, including the SNARE Snc1 and members of the  
396 aminophospholipid-flippase family, such as Dnf1 (Siniosoglou and Pelham, 2001;

397 Conibear and Stevens, 2003; Takagi *et al.*, 2012; Eising *et al.*, 2019). Glucose  
398 starvation has been suggested to have a direct effect on the abundance of plasma  
399 membrane proteins by downregulation of the recycling pathway (Lang *et al.*, 2014).  
400 Our results suggest that this pathway is independent of Vps53 phosphorylation.

401 Instead of any trafficking-related phenotypes, we find that Vps53 phosphorylation  
402 affects mitochondrial morphology. In a non-phosphorylatable Vps53 mutant,  
403 mitochondria fragmented significantly faster compared to cells expressing a WT  
404 version or a phospho-mimetic version of Vps53. Fragmentation of fission yeast  
405 mitochondria upon glucose depletion has been shown before (Zheng *et al.*, 2019).  
406 However, long term exposure to respiratory growth conditions result in a tabulated  
407 mitochondrial network (Egner *et al.*, 2002). The opposite effects we observe after 90  
408 minutes of growth in lactate could be part of a remodeling process to adapt to different  
409 bioenergetics (Westermann, 2012). At the moment we can only speculate about the  
410 role of Vps53 and phosphorylation by Snf1 in this process. Our data suggest that  
411 phosphorylation of Vps53 leads to the formation of a membrane contact site between  
412 the Golgi-apparatus and mitochondria, which we coined GoMiCS. While membrane  
413 contact sites have been observed between almost all organelles in the cell (Shai *et al.*,  
414 2018), GoMiCS have been undetected so far. One reason could be the highly dynamic  
415 behavior of both the Golgi apparatus and mitochondria in yeast. Similar to other  
416 studies, we were only able to identify the described contact site by a microscopy-based  
417 fluorescence complementation assay. However, it is important to emphasize that *i*) we  
418 observe GoMiCS with proteins expressed under their endogenous promotor and *ii*) the  
419 exchange of a single amino acid in Vps53 leads to the loss of the contact site. These  
420 findings argue against an artificial induction of the GoMiCS by the tags used for the  
421 complementation assay.

422 Our observation of a Vps53 role in formation of GoMiCS agrees with previous findings  
423 on additional functions of subunits in tethering complexes. As another example, the  
424 Vps39 subunit of the vacuolar HOPS tethering complex also mediates the formation of  
425 a contact site, here between the yeast vacuole and mitochondria (Elbaz-Alon *et al.*,  
426 2014; Hönscher *et al.*, 2014). In addition, the formation of this contact site is dependent  
427 on the available carbon source and Snf1, where respiratory growth conditions led to  
428 the reduction of the contact site after long term exposure to respiratory growth  
429 conditions. The physiological consequences of this reorganization of membrane

430 contact sites, for example regarding the transfer of lipids between organelles, remain  
431 to be explored.

432 Membrane contact sites have been described as regions of vesicle-independent  
433 transport of lipids or other metabolites between adjacent organelles. We originally  
434 identified Vps53 phosphorylation to be decreased in sphingolipid depleted cells  
435 (Fröhlich *et al.*, 2016). Does formation of GoMiCS play a role in sphingolipid transfer  
436 between the Golgi and mitochondria and thus affect sphingolipid homeostasis? AMPK  
437 activation has been linked to sphingolipid homeostasis but mechanistic insights are  
438 lacking (Liu *et al.*, 2013). Our data suggest that Snf1 activation upon carbon source  
439 depletion could be attenuated by additional inhibition of sphingolipid metabolism by  
440 myriocin. However, the signaling pathway regulating Snf1 upon sphingolipid depletion  
441 remains elusive. In addition, the GARP complex plays an important role in maintaining  
442 sphingolipid homeostasis (Fröhlich *et al.*, 2015; Petit *et al.*, 2020). In our current study  
443 we do not observe an influence of Vps53 phosphorylation on sphingolipid metabolism.  
444 However, the only sphingolipid modifying enzyme located at mitochondria is Isc1, the  
445 yeast homolog of a neutral sphingomyelinase (Kitagaki *et al.*, 2007). The exact function  
446 of Isc1 at mitochondria remains largely elusive, since complex sphingolipids, the  
447 substrate of Isc1, are not found there. But Isc1 has been implicated in mitochondrial  
448 fission and mitophagy (Teixeira *et al.*, 2015).

449 In contrast to sphingolipids Phosphatidylethanolamine (PE) is generated in  
450 mitochondria by the phosphatidylserine decarboxylase Psd1. The required  
451 phosphatidylserine is likely be transported via membrane contact sites towards  
452 mitochondria (Aaltonen *et al.*, 2016). In addition, Psd1 generated PE has been  
453 implicated in mitochondrial fusion (Chan and McQuibban, 2012; Joshi *et al.*, 2012). If  
454 the mitochondrial remodeling we observe after 90 min of lactate exposure is the  
455 starting point of mitochondrial fusion, additional PE import could be required (Calzada  
456 *et al.*, 2019). Vps53 dependent GoMiCS could therefore be an additional source for of  
457 PE import into mitochondria. Along that line, the second phosphatidylserine  
458 decarboxylase Psd2 is localized at the Golgi/endosomal system (Kitamura *et al.*, 2002;  
459 Gulshan *et al.*, 2010).

460 Since the C-terminal part of Vps53 that carries the identified phosphorylation is not  
461 conserved in mammalian cells, it is unclear if the mammalian GARP complex has a  
462 similar function in the formation of a membrane contact site. Interestingly, organelle

463 contacts between the Golgi and mitochondria have been described (Dolman *et al.*,  
464 2005; Valm *et al.*, 2017) and a role in calcium signaling has been suggested. Whether  
465 formation of these contacts is GARP dependent remains to be studied in the future.

466

## 467 **Materials and Methods**

468

### 469 **Yeast strains and plasmids**

470 Yeast strains used in this study are described in supplementary file 1. Plasmids used in this  
471 study are summarized in supplementary file 2. Genetic manipulations were made by  
472 homologous recombination of PCR fragments as described previously. For the generation of  
473 endogenously expressed GFP tagged Vps53 phospho mutants, WT strains were first  
474 transformed with the tag and a resistance marker according to standard procedures. To  
475 introduce the genomically encoded phospho mutants the transformed yeast strain was used  
476 to amplify parts of the Vps53 c-terminus together with the GFP tag and the resistance marker.  
477 Mutations were introduced with the forward primer. The resulting PCR products were used to  
478 transform WT strains. Introduction of the tag and resistance marker were confirmed by PCR.  
479 Introduction of the mutation was checked via PCR amplification and sequencing.

480

### 481 **Yeast media and growth conditions**

482 Yeast cells were grown in rich media YP + X containing the respective carbon source 2% (w/v)  
483 D-glucose (X = D) or 2% (w/v) galactose (X = G); 1% (w/v) yeast extract and 2% (w/v) Peptone  
484 or in selective synthetic minimal media (SD + Y; 0.67% yeast nitrogen base without amino  
485 acids, 2% carbon source and supplemented amino acids).

486 Lactic acidic stress was induced by shifting cells (OD<sub>600</sub> 0.8) to YP + or SC + X media  
487 containing 2% lactate or 0.5% lactate. Glucose starvation was induced by shifting cells to  
488 medium containing 0.05% glucose. The respective percentage (w/v) of carbon source was  
489 used and cells were incubated for 90 min at 30 °C unless otherwise noted.

490 For SILAC labeling procedures, lysine auxotroph strains were grown in SC-D -lysine medium  
491 consisting of 2% glucose or 2% lactate, 6.7 g/L yeast nitrogen base without amino acids and  
492 yeast synthetic dropout without lysine (Sigma Aldrich). Pre-cultures were grown over night in  
493 the presence of 30 mg/L normal lysine or heavy lysine (L-Lysine <sup>13</sup>C<sub>6</sub><sup>15</sup>N<sub>2</sub>; Cambridge Isotope  
494 Laboratories) and diluted to OD<sub>600</sub> 0.1. Cells were grown to OD<sub>600</sub> 0.5-1 before harvest.

495

### 496 **Fluorescence Microscopy**

497 Cells were grown to logarithmic phase in synthetic selective media (SC-D) containing 2%  
498 glucose supplemented with essential amino acids. Where indicated, cells were switched to

499 respiratory growth conditions ( $X = 2\%$  lac) and starvation ( $X = 0.002\%$  glc) was induced by  
500 transferring them at  $OD_{600}$  0.8 to SC-X medium for 90 min at 30 °C unless otherwise noted.  
501 Cells were imaged live in SC medium unless stated otherwise on an Olympus IX-71 inverted  
502 microscope equipped with 100 x NA 1.49 and 60x NA 1.40 objectives, a sCMOS camera  
503 (PCO, Kelheim, Germany), an InsightSSI illumination system, BF (bright field); 4',6-diamidino-  
504 2-phenylindole; GFP; mCherry and Cy5 filters, and SoftWoRx software (Applied Precision,  
505 Issaquah, WA). We used z-stacks with 350 nm spacing for constrained-iterative deconvolution  
506 (SoftWoRx). All microscopy image processing and quantification was performed using ImageJ  
507 (National Institutes of Health, Bethesda, MD; RRID:SCR\_003070). Maximum intensity Z  
508 projections are shown unless otherwise noted. Where indicated, at least 50 cells from 3  
509 independent experiments were quantified for the relevant statistics.

510 Visualization organelle proximity using bimolecular fluorescent complementation (BifC) assay.  
511 For juxtaposition Vps53 or late Golgi-mitochondria 3D image stacks of 6 images were collected  
512 with 350 nm z-increment. Positive signals within the cell volume shown in (Fig. 6) were  
513 determined using a manual and automatic method. Manual method: minimum thresholds were  
514 set manually and the gaussian blur with a sigma radius of 0.5 was applied to minimize the  
515 cytosolic signals. For the automated method, the quantification of foci was performed in  
516 ImageJ (national Institutes of Health, Bethesda, MD) by a self-written image processing  
517 application combining built-in routines and the "3D Objects counter" plug-in. Briefly, single cells  
518 were segmented from the bright field image and Venus signals within the deconvolved image  
519 stack were counted based on the plug in "3D Objects Counter". For the optimization of the  
520 signal-to-noise ratio was each signal within the stack convolved with the standard deviation  
521 sigma of a Gaussian function (Gaussian-Blur), whereby sigma was given in units  
522 corresponding to the pixel scale, in addition background signals were removed by selecting a  
523 background-area. Signal intensities were normalized and convolved with the mean of the  
524 Venus kernel. Foci segmentation within the stack was restricted to a maximum threshold of  
525 180 and to a minimum voxel value of 10. Objects were displayed and counted in a map of all  
526 z-planes. Maximum intensity z projections of z planes with signals are shown. Raw images  
527 were quantified and are shown. Graphs show mean  $\pm$  SD for three independent experiments.

528 vCLAMP reporter strain images shown are deconvolved images of one z-plane. For the  
529 quantification of the signal in the reporter strain. The total cell fluorescence per cell of the sum  
530 intensity z projection was quantified with ImageJ. The formula  $CTCF = \text{Integrated Density} -$   
531  $(\text{Area of selected cell} \times \text{Mean fluorescence of background readings})$  was used to calculate the  
532 corrected total cell fluorescence. Graphs show mean  $\pm$  SD for three independent experiments.

533 Mitochondria morphology was examined by 3D projection. Deconvolved z-stacks of 12 images  
534 with 350 nm spacing were used. Cells bearing plasmid pXY142-mtGFP were grown in

535 selective synthetic medium without Leucin (Leu). Graphs show mean  $\pm$  SD for three  
536 independent experiments.

537

### 538 **Mitophagy assay**

539 Strains were grown to mid-log phase in glucose-containing YPD medium. Ten OD<sub>600</sub> units  
540 each were collected as control samples. Cells were washed once with water and  
541 resuspended to an OD<sub>600</sub> of 0.5 in SC + 0.5% lactate or nitrogen-free SD-N medium. The  
542 *pep4 $\Delta$*  strain was additionally treated with 1 mM PMSF to completely block vacuolar  
543 proteolysis. Ten OD<sub>600</sub> units each were harvested after 90 and 360 min. The Pho8 assay was  
544 performed as described (Schäfer and Schuck, 2020) with lysates adjusted to 4 ODs/100  $\mu$ l  
545 and a reaction time of 25 min. Specific phosphatase activities were normalized to the  
546 activities in the corresponding control samples to obtain fold changes.

547

### 548 **Liquid CPY-Invertase assay**

549 Invertase deficient W303 *suc2 $\Delta$*  cells were grown according to the standard procedures in YP  
550 2% fructose medium. Cells were shifted for 90 min to YP 2% lactate containing medium.  
551 10 OD<sub>600</sub> units were used for cells expressing Vps53, Vps53<sub>S790A</sub> and Vps53<sub>S790D</sub>. For strains  
552 deleted for endogenous Vps53 expressing empty pRS306 vector 0.5 OD<sub>600</sub> units were used.  
553 The assay was performed according to the procedure used by (Dalton *et al.*, 2015). Results  
554 are reported as units of activity per 1 OD<sub>600</sub> for cells grown under respiratory growth conditions  
555 and control cells. Error bars represent the standard deviation for three biological experiments,  
556 and three technical replicates were analyzed. Comparison between cells expressing the WT  
557 form and the phospho-mutants Vps53 were made using unrelated t-test. A p value <0.005 was  
558 consider significant.

559

### 560 ***In vitro* kinase assays**

561 Recombinant GST-Vps53<sub>552-811</sub> and active Elm1<sup>KD</sup> were incubated with recombinant wild type  
562 Snf1<sup>KD</sup> or the kinase dead mutant (T210A). Kinases and substrate were mixed at a 1:1:5 ratio  
563 in Phosphorylation-Buffer [10 mM Tris (pH 7.5), 10 mM MgCl<sub>2</sub>, 0.4 mM EDTA, 10% glycerol,  
564 1 mM ATP] and incubated at 30 °C for 30 min and gentle shaking (300 – 500 rpm). For mass  
565 spectrometry analysis 50  $\mu$ l of denaturation buffer was added.

566

### 567 **Protein Expression and Purification**

568 Recombinant GST tagged Vps53 C-terminal fragment (residue 552-822) was purified for the  
569 kinase assay from 1 L [LB, 100  $\mu$ g/ml Ampicillin and 100  $\mu$ g/ml Chloramphenicol] *E. coli* BL21  
570 (DE3) Rosetta cells after induction [OD<sub>600</sub> 0.8] by 0.5 IPTG (isopropyl  $\beta$ -D-thiogalactosidase).  
571 Cells were cultured for 16 h at 16 °C. Cell lysis and extraction were carried out at 4 °C on ice.

572 Cells were harvested [5000 rpm, 10 min] and the pellet was washed once with 10 pellet volume  
573 Wash-Buffer (WB) [PBS (pH 7.0), 1 mM DTT, 0.1% (v/v) NP-40 and 300 mM NaCl] and  
574 resuspended in Lysis-Buffer [WB, 0.05 x PIC, 1 mM PMSF]. The cells were lysed, by a  
575 Microfluidizer Processor M-110L (Microfluidics) and the lysate was cleared by centrifugation  
576 [15 min, 15000 rpm at 4 °C]. Vps53 protein was purified by batch binding to glutathione (GSH)  
577 -Sepharose fast flow (GE-Healthcare) [1 h at 4 °C]. The resin was washed five times with 100  
578 bead volume WB [1000 rpm at 4 °C]. To elute immobilized GST-Vps53 recombinant protein,  
579 resin was incubated twice with 15 mM and 20 mM reduced GSH for 15 min at 4 °C. Fractions  
580 of purification steps and eluate were resuspended in sample buffer boiled for 5 min at 95 °C.  
581 Proteins were finally resolved by SDS-PAGE.

582 The following recombinant proteins were purified according the same procedure as described  
583 before. Deviation from the protocol are indicated. The GST-Snf1 kinase domains (wild-type  
584 and T210A; residues 1-392) were expressed and purified. The purified protein was eluted with  
585 PreScission protease (final volume of 1 ml), incubated at 16 °C for 2 h on a rotating wheel.  
586 GST-Vps53 and Snf1 kinase domains eluates were dialyzed against the kinase assay buffer  
587 [20 mM Hepes (pH 7.0), 0.5 mM DTT, 5 mM MgOAc]. Glycerol was added to a final  
588 concentration of 5% (v/v), and aliquots were stored at -80 °C.

589 Yeast cells expressing TAP tagged Elm1 kinase domain (residues 421-640) were cultured in  
590 2 L YPG to OD<sub>600</sub> 3-5 and harvested. The pellet was resuspended in TAP-Buffer [Wash-Buffer,  
591 0.05 x Pic, 1 mM PMSF, 1 mM TCEP] followed by lysis with glass beads in a FastPrep™  
592 machine (MP Biomedicals). Lysate was centrifuged for 20 min, 4000 rpm at 4 °C followed by  
593 ultracentrifugation [35000 rpm, 1.10 h]. Supernatant was incubated with IgG Sepharose 6 Fast  
594 Flow (GE Healthcare) for 2 h at 4 °C on a nutator. IgG resin was washed with 15 mL Wash-  
595 Buffer [PBS (pH 7.0), 10% (v/v) glycerol, 20 mM Chaps, 1 mM NaF, 1 mM Na<sub>3</sub>VO<sub>4</sub>, 20 mM β-  
596 Glycerophosphate]. TEV cleavage of immobilized protein was performed in 400 μL Cleavage-  
597 Buffer [PBS (pH 7.0), 10% Glycerol, 20 mM Chaps] over night at 4 °C on a turning wheel.  
598 Detergent from the eluate was removed by Detergent Removal Spin Column (Pierce).

599

## 600 **Vacuolar isolations**

601 Respiratory growth conditions were induced at OD<sub>600</sub> 0.8 for 90 min. Vacuoles were purified  
602 from 2 L. Same OD-units of SILAC labeled cell cultures were mixed and harvested together  
603 and the pellet treated with Tris-buffer (0.1 M Tris, pH 9.4; 10 mM DTT) and spheroplasting  
604 buffer (0.6 M sorbitol, 50 mM KPi, pH 7.4, in 0.2x YPD). After lyticase digestion, vacuoles were  
605 isolated via dextran lysis and Ficoll gradient flotation (Cabrera and Ungermann, 2009). 500 μl  
606 of the 0-4% interphase were taken and mixed with 25 μl 20x PIC. Protein concentration was  
607 measured by a Bradford assay.

608



## 609 **GFP pulldown assays**

610 Cells were grown in the presence of “heavy” lysine (L-lysine-U-13C6,15N2) and WT cells were  
611 grown in the presence of normal, “light” lysine. We harvested 500 OD600 units of cells by  
612 centrifugation and resuspended them in 500  $\mu$ l of lysis buffer (150 mM KOAc, 20 mM 4-(2-  
613 hydroxyethyl)-1-piperazineethanesulfonic acid [HEPES], pH 7.4, 10% glycerol, and complete  
614 protease inhibitor cocktail [Roche, Basel, Switzerland]). Zirconia beads (500  $\mu$ l, 0.1-mm  
615 diameter; BioSpec Products, Bartlesville, OK) were added and cells were lysed using a  
616 FASTPREP (MP Biomedicals, Solon, OH) for 60 s at 4°C. Beads were removed by  
617 centrifugation, and Triton X-100 was added to a final concentration of 1%. After a 30-min incu-  
618 bation at 4°C, lysates were cleared by centrifugation for 10 min at 1000  $\times$  g. Equivalent  
619 amounts of “light”-labeled control and “heavy”-labeled *GFP*-containing lysates or “light”-  
620 labeled control and “heavy”-labeled *GFP*-containing lysates were incubated (separately) with  
621 *GFP*-Trap agarose beads (Allele Biotechnology, San Diego, CA) for 30 min at 4°C. Beads were  
622 washed three times with lysis buffer and three times with wash buffer (150 mM NaCl, 20 mM  
623 HEPES, pH 7.4). Beads from *GFP* pull downs and control pull downs were combined in 100  $\mu$ l  
624 of denaturation buffer.

625

## 626 **Proteomics**

627 Mass spectrometry was done with purified vacuoles and whole cell lysate. Vacuoles were  
628 further purified by in-gel digest and cell lysate samples by Filter Aided Sample Preparation  
629 (FASP; Wiśniewski *et al.*, 2009). Purified vacuole samples were precipitated with 100% TCA  
630 and the protein pellet washed with acetone. The pellet was solved in 4x loading dye and loaded  
631 on a 10% denaturing SDS-gel for some minutes.

632 For in gel digestion, gel pieces with proteins were excised and incubated in destaining buffer  
633 [25 mM NH<sub>4</sub>HCO<sub>3</sub> (ABC) / 50% EtOH] twice for 20 min at 25°C under shaking. After  
634 dehydration in 100% EtOH [twice for 10 min at 25°C] and drying the gel pieces were rehydrated  
635 in reduction buffer [10 mM DTT in 50 mM ABC] for 60 min at 56°C followed by alkylation [55  
636 mM iodoacetamide in 50 mM ABC] for 45 min at 25°C in the dark and another washing step  
637 for 20 min with digestion buffer. After dehydration in EtOH [10 min, 25°C] and washing with  
638 digestion buffer [50 mM NH<sub>4</sub>HCO<sub>3</sub> in water, pH 8.0, 20 min, 25°C] gel pieces were again  
639 incubated twice with EtOH for 10 min and dried. Gel pieces were rehydrated in LysC solution  
640 [final 16  $\mu$ g/ml in 50 mM ABC] for 20 min at 4°C, the excess of solution was removed, digestion  
641 buffer added and the sample incubated over night at 37°C. Digestion was stopped by adding  
642 2  $\mu$ l 100% TFA. Gel pieces were incubated twice in extraction buffer [3% TFA / 30% ACN] for  
643 10 min at 25°C and twice with ACN for 10 min at 25°C. The supernatants were collected and  
644 dried until most of the solvent was gone and resolved in 50  $\mu$ l HPLC-grade water.

645 Cell lysate pellets were lysed in 200  $\mu$ l lysis buffer [Tris 0.1 M, pH 9; 0.1 M DTT; 5% SDS] for  
646 30 min at 55°C and mixed with 1.2 ml 8 M urea in 0.1 M Tris/HCl pH 8.5 (UA). The cell lysate  
647 was centrifuged in a wet filter unit (30.000K) for 15 min at 14.000 rpm and the filter washed  
648 four times with 200  $\mu$ l UA for each 10 min. 200  $\mu$ l IAA solution [0.05 M iodoacetamide in UA]  
649 was added to the filter units, shaken vigorously for 1 min and then incubated for 20 min without  
650 mixing in the dark. Samples were washed four times with UA for 10 min at 14.000 rpm and  
651 washed again with 50 mM ABC and three times with 20 mM.

652 For mass spectrometry analysis of GFP-Pulldown, *in vitro* kinase assay and GST-Pulldown  
653 samples, in solution digestion was performed. Denaturation buffer was added to the sample (8  
654 M urea, 50 mM Tris-HCl, pH 8, 1 mM dithiothreitol) and incubated for 30 min. Proteins were  
655 alkylated by the addition of 5.5 mM iodoacetamide for 20 min in the dark and digested with the  
656 endoproteinase LysC or Trypsine overnight at 37°C. The resulting peptide mixture was  
657 removed from the beads and desalted following the protocol for StageTip purification  
658 (Rappsilber *et al.*, 2003).

659 Reversed-phase chromatography was performed on a Thermo Ultimate 3000 RSLCnano  
660 system connected to a Q Exactive*Plus* mass spectrometer (Thermo) through a nano-  
661 electrospray ion source. Peptides were separated on 50 cm PepMap® C18 easy spray  
662 columns (Thermo) with an inner diameter of 75  $\mu$ m. The column temperature was kept at 40  
663 °C. Peptides were eluted from the column with a linear gradient of acetonitrile from 10%–35%  
664 in 0.1% formic acid for 118 min at a constant flow rate of 300 nl/min. Eluted peptides from the  
665 column were directly electrosprayed into the mass spectrometer. Mass spectra were acquired  
666 on the Q Exactive*Plus* in a data-dependent mode to automatically switch between full scan MS  
667 and up to ten data-dependent MS/MS scans. The maximum injection time for full scans was  
668 50 ms, with a target value of 3,000,000 at a resolution of 70,000 at  $m/z = 200$ . The ten most  
669 intense multiply charged ions ( $z=2$ ) from the survey scan were selected with an isolation width  
670 of 1.6 Th and fragment with higher energy collision dissociation (Olsen *et al.*, 2007) with  
671 normalized collision energies of 27. Target values for MS/MS were set at 100,000 with a  
672 maximum injection time of 80 ms at a resolution of 17,500 at  $m/z = 200$ . To avoid repetitive  
673 sequencing, the dynamic exclusion of sequenced peptides was set at 30 s. The resulting MS  
674 and MS/MS spectra were analyzed using MaxQuant (version 1.6.0.13, [www.maxquant.org/](http://www.maxquant.org/);  
675 (Cox and Mann, 2008; Cox *et al.*, 2011) as described previously (Fröhlich *et al.*, 2013). All  
676 calculations and plots were performed with the R software package ([www.r-project.org/](http://www.r-project.org/);  
677 RRID:SCR\_001905)

678

## 679 **Antibodies**

680 The primary antibodies used in this study were as follows: mouse anti-HA antibody (Roche  
681 Life Science), mouse anti-PGK1 monoclonal antibody (Thermo Fisher/Invitrogen),

682 polyhistidine antibody H1029 (SigmaAldrich) to detect Snf1 and phospho-Thr172–AMPK  
683 antibody (Cell Signalling Technology). Secondary antibodies were HRP-conjugated  
684 (horseradish peroxidase) anti-mouse and anti-rabbit IgG (Santa Cruz Biotechnology, Dallas,  
685 TX, United States)

## 686 **Acknowledgements**

687 We thank members of the Fröhlich lab, Christian Ungermann and Sebastien Leon for critical  
688 comments on the manuscript. Florian Fröhlich is supported by the DFG grant FR 3647/2-2 and  
689 the SFB944 (P20). Sebastian Schuck is supported by DFG grant EXC 81.

## 690 **References**

- 691 Aaltonen, MJ, Friedman, JR, Osman, C, Salin, B, di Rago, JP, Nunnari, J, Langer, T, and  
692 Tatsuta, T (2016). MIC OS and phospholipid transfer by Ups2-Mdm35 organize membrane  
693 lipid synthesis in mitochondria. *J Cell Biol* 213, 525–534.
- 694 Aoh, QL, Hung, CW, and Duncan, MC (2013). Energy metabolism regulates clathrin  
695 adaptors at the trans-Golgi network and endosomes. *Mol Biol Cell* 24, 832–847.
- 696 Aung-Htut, MT, Lam, YT, Lim, Y-L, Rinnerthaler, M, Gelling, CL, Yang, H, Breitenbach, M,  
697 and Dawes, IW (2013). Maintenance of mitochondrial morphology by autophagy and its role  
698 in high glucose effects on chronological lifespan of *Saccharomyces cerevisiae*. *Oxid Med*  
699 *Cell Longev* 2013, 636287.
- 700 Bean, BDM, Davey, M, and Conibear, E (2017). Cargo selectivity of yeast sorting nexins.  
701 *Traffic* 18, 110–122.
- 702 Bonifacino, JS, and Glick, BS (2004). The Mechanisms of Vesicle Budding and Fusion. *Cell*  
703 116, 153–166.
- 704 Bonifacino, JS, and Hierro, A (2011). Transport according to GARP: Receiving retrograde  
705 cargo at the trans-Golgi network. *Trends Cell Biol* 21, 159–167.
- 706 Braun, KA, Vaga, S, Dombek, KM, Fang, F, Palmisano, S, Aebersold, R, and Young, ET  
707 (2014). Phosphoproteomic analysis identifies proteins involved in transcription-coupled  
708 mRNA decay as targets of Snf1 signaling. *Sci Signal*.
- 709 Cabrera, M, and Ungermann, C (2009). Purification and in vitro analysis of yeast vacuoles.  
710 *Methods Enzymol* 451, 177–196.
- 711 Calzada, E, Avery, E, Sam, PN, Modak, A, Wang, C, McCaffery, JM, Han, X, Alder, NN, and  
712 Claypool, SM (2019). Phosphatidylethanolamine made in the inner mitochondrial membrane  
713 is essential for yeast cytochrome bc 1 complex function. *Nat Commun* 10, 1–17.

- 714 Campbell, CL, and Thorsness, PE (1998). Escape of mitochondrial DNA to the nucleus in  
715 yme1 yeast is mediated by vacuolar-dependent turnover of abnormal mitochondrial  
716 compartments. *J Cell Sci* 111, 2455–2464.
- 717 Chan, EYL, and McQuibban, GA (2012). Phosphatidylserine decarboxylase 1 (Psd1)  
718 promotes mitochondrial fusion by regulating the biophysical properties of the mitochondrial  
719 membrane and alternative topogenesis of mitochondrial genome maintenance protein 1  
720 (Mgm1). *J Biol Chem* 287, 40131–40139.
- 721 Chou, H-T, Dukovski, D, Chambers, MG, Reinisch, KM, and Walz, T (2016). CATCHR,  
722 HOPS and CORVET tethering complexes share a similar architecture. *Nat Struct Mol Biol*,  
723 13–16.
- 724 Conboy, MJ, and Cyert, MS (2000). Luv1p/Rki1p/Tcs3p/Vps54p, a Yeast Protein That  
725 Localizes to the Late Golgi and Early Endosome, Is Required for Normal Vacuolar  
726 Morphology. *Mol Biol Cell* 11, 2429–2443.
- 727 Conibear, E, and Stevens, TH (2000). Vps52p, Vps53p, and Vps54p Form a Novel  
728 Multisubunit Complex Required for Protein Sorting at the Yeast Late Golgi. *Mol Biol Cell* 11,  
729 305–323.
- 730 Conibear, E, and Stevens, TH (2003). Vps51p Mediates the Association of the GARP  
731 (Vps52/ 53/54) Complex with the Late Golgi t-SNARE Tlg1p. *Mol Biol Cell* 14, 1610–1623.
- 732 Cox, J, and Mann, M (2008). MaxQuant enables high peptide identification rates,  
733 individualized p.p.b.-range mass accuracies and proteome-wide protein quantification. *Nat*  
734 *Biotechnol* 26, 1367–1372.
- 735 Cox, J, Neuhauser, N, Michalski, A, Scheltema, RA, Olsen, J V., and Mann, M (2011).  
736 Andromeda: A peptide search engine integrated into the MaxQuant environment. *J Proteome*  
737 *Res* 10, 1794–1805.
- 738 Dale, S, Wilson, WA, Edelman, AM, and Hardie, DG (1995). Similar substrate recognition  
739 motifs for mammalian AMP-activated protein kinase, higher plant HMG-CoA reductase  
740 kinase-A, yeast SNF1, and mammalian calmodulin-dependent protein kinase I. *FEBS Lett*  
741 361, 191–195.
- 742 Dalton, L, Davey, M, and Conibear, E (2015). Large-scale analysis of membrane transport in  
743 yeast using invertase reporters. *Methods Mol Biol* 1270, 395–409.
- 744 Dancourt, J, and Barlowe, C (2010). Protein Sorting Receptors in the Early Secretory  
745 Pathway. *Annu Rev Biochem* 79, 777–802.
- 746 Darsow, T, Odorizzi, G, and Emr, SD (2000). Invertase fusion proteins for analysis of protein  
747 trafficking in yeast. *Methods Enzymol* 327, 95–106.

- 748 Day, KJ, Casler, JC, and Glick, BS (2018). Budding Yeast Has a Minimal Endomembrane  
749 System. *Dev Cell* 44, 56-72.e4.
- 750 Defenouillère, Q, Verraes, A, Laussel, C, Friedrich, A, Schacherer, J, and Léon, S (2019).  
751 The induction of HAD-like phosphatases by multiple signaling pathways confers resistance to  
752 the metabolic inhibitor 2-deoxyglucose. *Sci Signal* 12, eaaw8000.
- 753 Doherty, GJ, and McMahon, HT (2009). Mechanisms of Endocytosis. *Annu Rev Biochem* 78,  
754 857–902.
- 755 Dolman, NJ, Gerasimenko, J V., Gerasimenko, O V., Voronina, SG, Petersen, OH, and  
756 Tepikin, A V. (2005). Stable Golgi-mitochondria complexes and formation of Golgi Ca<sup>2+</sup>  
757 gradients in pancreatic acinar cells. *J Biol Chem* 280, 15794–15799.
- 758 Egner, A, Jakobs, S, and Hell, SW (2002). Fast 100-nm resolution three-dimensional  
759 microscope reveals structural plasticity of mitochondria in live yeast. *Proc Natl Acad Sci U S*  
760 *A* 99, 3370–3375.
- 761 Eisenberg-Bord, M, Shai, N, Schuldiner, M, and Bohnert, M (2016). A Tether Is a Tether Is a  
762 Tether: Tethering at Membrane Contact Sites. *Dev Cell* 39, 395–409.
- 763 Eising, S, Thiele, L, and Fröhlich, F (2019). A Systematic Approach to Identify Recycling  
764 Endocytic Cargo Depending on the GARP Complex Abstract. *Elife*.
- 765 Elbaz-Alon, Y, Rosenfeld-Gur, E, Shinder, V, Futerman, AH, Geiger, T, and Schuldiner, M  
766 (2014). A dynamic interface between vacuoles and mitochondria in yeast. *Dev Cell* 30, 95–  
767 102.
- 768 Fröhlich, F, Christiano, R, and Walther, TC (2013). Native SILAC: metabolic labeling of  
769 proteins in prototroph microorganisms based on lysine synthesis regulation. *Mol Cell*  
770 *Proteomics* 12, 1995–2005.
- 771 Fröhlich, F, Olson, DK, Christiano, R, Farese, R V., and Walther, TC (2016). Proteomic and  
772 phosphoproteomic analyses of yeast reveal the global cellular response to sphingolipid  
773 depletion. *Proteomics* 16, 2759–2763.
- 774 Fröhlich, F, Petit, C, Kory, N, Christiano, R, Hannibal-Bach, HK, Graham, M, Liu, X, Ejsing,  
775 CS, Farese, R V, and Walther, TC (2015). The GARP complex is required for cellular  
776 sphingolipid homeostasis. *Elife* 4, e08712.
- 777 Gatta, AT, and Levine, TP (2017). Piecing Together the Patchwork of Contact Sites. *Trends*  
778 *Cell Biol* 27, 214–229.
- 779 Gnad, F, De Godoy, LMF, Cox, J, Neuhauser, N, Ren, S, Olsen, J V., and Mann, M (2009).  
780 High-accuracy identification and bioinformatic analysis of in vivo protein phosphorylation

781 sites in yeast. *Proteomics* 9, 4642–4652.

782 González Montoro, A, Auffarth, K, Hönscher, C, Bohnert, M, Becker, T, Warscheid, B,  
783 Reggiori, F, van der Laan, M, Fröhlich, F, and Ungermann, C (2018). Vps39 Interacts with  
784 Tom40 to Establish One of Two Functionally Distinct Vacuole-Mitochondria Contact Sites.  
785 *Dev Cell* 45, 621-636.e7.

786 Gulshan, K, Shahi, P, and Moye-Rowley, WS (2010). Compartment-specific synthesis of  
787 phosphatidylethanolamine is required for normal heavy metal resistance. *Mol Biol Cell* 21,  
788 443–455.

789 Guo, Y, Sirkis, DW, and Schekman, R (2014). Protein Sorting at the *trans*-Golgi Network.  
790 *Annu Rev Cell Dev Biol* 30, 169–206.

791 Hardie, DG (2007). AMP-activated/SNF1 protein kinases: Conserved guardians of cellular  
792 energy. *Nat Rev Mol Cell Biol* 8, 774–785.

793 Hong, SP, Leiper, FC, Woods, A, Carling, D, and Carlson, M (2003). Activation of yeast Snf1  
794 and mammalian AMP-activated protein kinase by upstream kinases. *Proc Natl Acad Sci U S*  
795 *A* 100, 8839–8843.

796 Hönscher, C, Mari, M, Auffarth, K, Bohnert, M, Griffith, J, Geerts, W, van der Laan, M,  
797 Cabrera, M, Reggiori, F, and Ungermann, C (2014). Cellular metabolism regulates contact  
798 sites between vacuoles and mitochondria. *Dev Cell*.

799 Jiang, R, and Carlson, M (1996). Glucose regulates protein interactions within the yeast  
800 SNF1 protein kinase complex. *Genes Dev* 10, 3105–3115.

801 Jones, CB, Ott, EM, Keener, JM, Curtiss, M, Sandrin, V, and Babst, M (2012). Regulation of  
802 Membrane Protein Degradation by Starvation-Response Pathways. *Traffic* 13, 468–482.

803 Joshi, AS, Thompson, MN, Fei, N, Ttemann, MH, and Greenberg, ML (2012). Cardiolipin and  
804 mitochondrial phosphatidylethanolamine have overlapping functions in mitochondrial fusion  
805 in *Saccharomyces cerevisiae*. *J Biol Chem* 287, 17589–17597.

806 Kanki, T, Kang, D, and Klionsky, DJ (2009). Monitoring mitophagy in yeast: The Om45-GFP  
807 processing assay. *Autophagy* 5, 1186–1189.

808 Kim, K, and Gadila, SKG (2016). Cargo trafficking from the trans-Golgi network towards the  
809 endosome. *Biol Cell* 108, 205–218.

810 Kitagaki, H, Cowart, LA, Matmati, N, Vaena de Avalos, S, Novgorodov, SA, Zeidan, YH,  
811 Bielawski, J, Obeid, LM, and Hannun, YA (2007). Isc1 regulates sphingolipid metabolism in  
812 yeast mitochondria. *Biochim Biophys Acta - Biomembr* 1768, 2849–2861.

813 Kitamura, H, Wu, WI, and Voelker, DR (2002). The C2 domain of phosphatidylserine

814 decarboxylase 2 is not required for catalysis but is essential for in vivo function. *J Biol Chem*  
815 277, 33720–33726.

816 Lang, MJ, Martinez-Marquez, JY, Prosser, DC, Ganser, LR, Buelto, D, Wendland, B, and  
817 Duncan, MC (2014). Glucose Starvation Inhibits Autophagy via Vacuolar Hydrolysis and  
818 Induces Plasma Membrane Internalization by Down-regulating Recycling \* □ S.

819 Lee, YJ, Jeschke, GR, Roelants, FM, Thorner, J, and Turk, BE (2012). Reciprocal  
820 Phosphorylation of Yeast Glycerol-3-Phosphate Dehydrogenases in Adaptation to Distinct  
821 Types of Stress.

822 Lewis, MJ, Nichols, BJ, Prescianotto-Baschong, C, Riezman, H, and Pelham, HRB (2000).  
823 Specific Retrieval of the Exocytic SNARE Snc1p from Early Yeast Endosomes.

824 Liu, J, Huang, X, Withers, BR, Blalock, E, Liu, K, and Dickson, RC (2013). Reducing  
825 sphingolipid synthesis orchestrates global changes to extend yeast lifespan. *Aging Cell* 12,  
826 833–841.

827 Lord, C, Ferro-Novick, S, and Miller, EA (2013). The highly conserved COPII coat complex  
828 sorts cargo from the endoplasmic reticulum and targets it to the Golgi. *Cold Spring Harb*  
829 *Perspect Biol* 5, a013367.

830 MacDonald, C, and Piper, RC (2017). Genetic dissection of early endosomal recycling  
831 highlights a TORC1-independent role for Rag GTPases. *J Cell Biol* 216, 3275–3290.

832 De Matteis, MA, and Luini, A (2008). Exiting the Golgi complex. *Nat Rev Mol Cell Biol* 9,  
833 273–284.

834 Maxfield, FR, and McGraw, TE (2004). Endocytic recycling. *Nat Rev Mol Cell Biol* 5, 121–  
835 132.

836 Olsen, J V., Macek, B, Lange, O, Makarov, A, Horning, S, and Mann, M (2007). Higher-  
837 energy C-trap dissociation for peptide modification analysis. *Nat Methods* 4, 709–712.

838 Ong, S-E, Blagoev, B, Kratchmarova, I, Kristensen, DB, Steen, H, Pandey, A, and Mann, M  
839 (2002). Stable isotope labeling by amino acids in cell culture, SILAC, as a simple and  
840 accurate approach to expression proteomics. *Mol Cell Proteomics* 1, 376–386.

841 Pelham, HRB (2002). Insights from yeast endosomes. *Curr Opin Cell Biol* 14, 454–462.

842 Petit, CS et al. (2020). Inhibition of sphingolipid synthesis improves outcomes and survival in  
843 GARP mutant wobbler mice, a model of motor neuron degeneration. *Proc Natl Acad Sci U S*  
844 *A* 117, 10565–10574.

845 Prinz, WA (2014). Bridging the gap: Membrane contact sites in signaling, metabolism, and  
846 organelle dynamics. *J Cell Biol* 205, 759–769.

- 847 Rambold, AS, Kostecky, B, Elia, N, and Lippincott-Schwartz, J (2011). Tubular network  
848 formation protects mitochondria from autophagosomal degradation during nutrient starvation.  
849 Proc Natl Acad Sci U S A 108, 10190–10195.
- 850 Reggiori, F, and Klionsky, DJ (2006). Atg9 sorting from mitochondria is impaired in early  
851 secretion and VFT-complex mutants in *Saccharomyces cerevisiae*. J Cell Sci 119, 2903–  
852 2911.
- 853 Robinson, JS, Klionsky, DJ, Banta, LM, and Emr, SD (1988). Protein sorting in  
854 *Saccharomyces cerevisiae*: isolation of mutants defective in the delivery and processing of  
855 multiple vacuolar hydrolases. Mol Cell Biol 8, 4936–4948.
- 856 Schäfer, JA, and Schuck, S (2020). ESCRTing endoplasmic reticulum to microautophagic  
857 degradation. Autophagy 00.
- 858 Schuck, S, Gallagher, CM, and Walter, P (2014). ER-phagy mediates selective degradation  
859 of endoplasmic reticulum independently of the core autophagy machinery. J Cell Sci 127,  
860 4078–4088.
- 861 Shai, N et al. (2018). Systematic mapping of contact sites reveals tethers and a function for  
862 the peroxisome-mitochondria contact. Nat Commun 9, 1–13.
- 863 Siniosoglou, S, Peak-Chew, SY, and Pelham, HRB (2000). Ric1p and Rgp1p form a  
864 complex that catalyses nucleotide exchange on Ypt6p. Eur Mol Biol Organ J 19, 4885–4894.
- 865 Siniosoglou, S, and Pelham, HRB (2001). An effector of Ypt6p binds the SNARE Tlg1p and  
866 mediates selective fusion of vesicles with late golgi membranes. EMBO J 20, 5991–5998.
- 867 Takagi, K, Iwamoto, K, Kobayashi, S, Horiuchi, H, Fukuda, R, and Ohta, A (2012).  
868 Involvement of Golgi-associated retrograde protein complex in the recycling of the putative  
869 Dnf aminophospholipid flippases in yeast. Biochem Biophys Res Commun 417, 490–494.
- 870 Teixeira, V, Medeiros, TC, Vilaça, R, Pereira, AT, Chaves, SR, Côte-Real, M, Moradas-  
871 Ferreira, P, and Costa, V (2015). Ceramide signalling impinges on Sit4p and Hog1p to  
872 promote mitochondrial fission and mitophagy in Isc1p-deficient cells. Cell Signal 27, 1840–  
873 1849.
- 874 Valm, AM, Cohen, S, Legant, WR, Melunis, J, Hershberg, U, Wait, E, Cohen, AR, Davidson,  
875 MW, Betzig, E, and Lippincott-Schwartz, J (2017). Applying systems-level spectral imaging  
876 and analysis to reveal the organelle interactome. Nat Publ Gr.
- 877 Vasan, N, Hutagalung, A, Novick, P, and Reinisch, KM (2010). Structure of a C-terminal  
878 fragment of its Vps53 subunit suggests similarity of Golgi-associated retrograde protein  
879 (GARP) complex to a family of tethering complexes. Proc Natl Acad Sci U S A 107, 14176–  
880 14181.



- 881 Westermann, B (2012). Bioenergetic role of mitochondrial fusion and fission. In: *Biochimica*  
882 *et Biophysica Acta - Bioenergetics*, Elsevier, 1833–1838.
- 883 Wilson, W a, Hawley, S a, and Hardie, DG (1996). Glucose repression/derepression in  
884 budding yeast: SNF1 protein kinase is activated by phosphorylation under derepressing  
885 conditions, and this correlates with a high AMP:ATP ratio. *Curr Biol* 6, 1426–1434.
- 886 Wiśniewski, JR, Zougman, A, Nagaraj, N, and Mann, M (2009). Universal sample preparation  
887 method for proteome analysis. *Nat Methods* 6, 359–362.
- 888 Wong, ED, Wagner, JA, Gorsich, SW, Mccaffery, JM, Shaw, JM, and Nunnari, J (2000). The  
889 Dynamin-related GTPase, Mgm1p, Is an Intermembrane Space Protein Required for  
890 Maintenance of Fusion Competent Mitochondria.
- 891 Yang, S, and Rosenwald, AG (2016). Autophagy in *Saccharomyces cerevisiae* requires the  
892 monomeric GTP-binding proteins, Arl1 and Ypt6. *Autophagy* 12.
- 893 Zheng, F, Jia, B, Dong, F, Liu, L, Rasul, F, He, J, and Fu, C (2019). Glucose starvation  
894 induces mitochondrial fragmentation depending on the dynamin GTPase Dnm1/Drp1 in  
895 fission yeast. *J Biol Chem* 294, 17725–17734.

896

897 **Table 1 Yeast strains**

| Strain name | Genotype                                                                                                                                                                                               | Source     |
|-------------|--------------------------------------------------------------------------------------------------------------------------------------------------------------------------------------------------------|------------|
| FFY949      | Mat $\alpha$ <i>ura3-52 trp1<math>\Delta</math> 2 leu2-3,112 his3-11 ade2-1 can1-100 lys2<math>\Delta</math>::NAT</i>                                                                                  | this study |
| FFY1076     | <i>his3<math>\Delta</math>200; leu2<math>\Delta</math>0; lys2<math>\Delta</math>0; met15<math>\Delta</math>0; trp1<math>\Delta</math>63; ura3<math>\Delta</math>0; pRS404_GAL1pr_ELM1(421-640)-TAP</i> | this study |
| FFY2017     | Mat A <i>ura3-52 trp1<math>\Delta</math> 2 leu2-3,112 his3-11 ade2-1 can1-100 lys2<math>\Delta</math>::NAT VPS53-GFP::hphNT1</i>                                                                       | this study |
| FFY2018     | Mat A <i>ura3-52 trp1<math>\Delta</math> 2 leu2-3,112 his3-11 ade2-1 can1-100 lys2<math>\Delta</math>::NAT VPS53(S790A)-GFP::hphNT1</i>                                                                | this study |
| FFY2026     | Mat A <i>ura3-52 trp1<math>\Delta</math> 2 leu2-3,112 his3-11 ade2-1 can1-100 lys2<math>\Delta</math>::NAT VPS53(S790D)-GFP::hphNT1</i>                                                                | this study |
| FFY887      | Mat $\alpha$ <i>ura3-52 trp1<math>\Delta</math> 2 leu2-3,112 his3-11 ade2-1 can1-100 vps53<math>\Delta</math>::NAT pRS306_VPS53 lys2<math>\Delta</math>::KanMX4</i>                                    | this study |
| FFY889      | Mat $\alpha$ <i>ura3-52 trp1<math>\Delta</math> 2 leu2-3,112 his3-11 ade2-1 can1-100 vps53<math>\Delta</math>::NAT pRS306_VPS53(S790A) lys2<math>\Delta</math>:: KanMX4</i>                            | this study |
| FFY888      | Mat $\alpha$ <i>ura3-52 trp1<math>\Delta</math> 2 leu2-3,112 his3-11 ade2-1 can1-100 vps53<math>\Delta</math>::NAT pRS306_VPS53(S790D) lys2<math>\Delta</math>:: KanMX4</i>                            | this study |
| FFY1704     | Mat A <i>ura3-52 trp1<math>\Delta</math> 2 leu2-3,112 his3-11 ade2-1 can1-100 vps53<math>\Delta</math>::NAT</i>                                                                                        | this study |

|         |                                                                                                                                        |                     |
|---------|----------------------------------------------------------------------------------------------------------------------------------------|---------------------|
|         | pRS306_VPS53 SEC7-mKate::kanMX4 p415 ADH mtBFP                                                                                         |                     |
| FFY1705 | Mat A <i>ura3-52 trp1Δ 2 leu2-3,112 his3-11 ade2-1 can1-100 vps53Δ::NAT</i><br>pRS306_VPS53(S790A) SEC7-mKate::kanMX4 p415 ADH mtBFP   | this study          |
| FFY1706 | Mat A <i>ura3-52 trp1Δ 2 leu2-3,112 his3-11 ade2-1 can1-100 vps53Δ::NAT</i><br>pRS306_VPS53(S790D) SEC7-mKate::kanMX4 p415 ADH mtBFP   | this study          |
| FFY1489 | Mat A <i>ura3-52 trp1Δ 2 leu2-3,112 his3-11 ade2-1 can1-100 VPS53-NV::kanMX4</i><br>TOM70-CV::HIS                                      | this study          |
| FFY1490 | Mat A <i>ura3-52 trp1Δ 2 leu2-3,112 his3-11 ade2-1 can1-100 VPS53(S790A)-NV::kanMX4</i><br>TOM70-CV::HIS                               | this study          |
| FFY1557 | Mat A <i>ura3-52 trp1Δ 2 leu2-3,112 his3-11 ade2-1 can1-100 VPS53(S790D)-NV::kanMX4</i><br>TOM70-CV::HIS                               | this study          |
| FFY1493 | Mat α <i>ura3-52 trp1Δ 2 leu2-3,112 his3-11 ade2-1 can1-100 vps53Δ::NAT</i><br>pRS306_VPS53 TOM70-CV::HIS SEC7-NV::kanMX4              | this study          |
| FFY1494 | Mat α <i>ura3-52 trp1Δ 2 leu2-3,112 his3-11 ade2-1 can1-100 vps53Δ::NAT</i><br>pRS306_VPS53(S790A) TOM70-CV::HIS SEC7-NV::kanMX4       | this study          |
| FFY1495 | Mat α <i>ura3-52 trp1Δ 2 leu2-3,112 his3-11 ade2-1 can1-100 l vps53Δ::NAT</i><br>pRS306_VPS53(S790D) TOM70-CV::HIS SEC7-NV::kanMX4     | this study          |
| FFY1504 | Mat α <i>ura3-52 trp1Δ 2 leu2-3,112 his3-11 ade2-1 can1-100 TOM70-CV::HIS SEC7-NV::kanMX4 ypt6Δ::hphNT1</i>                            | this study          |
| FFY810  | Mat α <i>ura3-52 trp1Δ 2 leu2-3,112 his3-11 ade2-1 can1-100 vps53Δ::NAT</i><br>pRS306_VPS53 <i>suc2Δ::kanMX4</i><br>pBHY11::LEU        | this study          |
| FFY812  | Mat α <i>ura3-52 trp1Δ 2 leu2-3,112 his3-11 ade2-1 can1-100 vps53Δ::NAT</i><br>pRS306_VPS53(S790A) <i>suc2Δ::kanMX4</i><br>pBHY11::LEU | this study          |
| FFY813  | Mat α <i>ura3-52 trp1Δ 2 leu2-3,112 his3-11 ade2-1 can1-100 vps53Δ::NAT</i><br>pRS306_VPS53(S790D) <i>suc2Δ::kanMX4</i><br>pBHY11::LEU | this study          |
| FFY816  | Mat α <i>ura3-52 trp1Δ 2 leu2-3,112 his3-11 ade2-1 can1-100 vps53Δ::NAT</i><br>pRS306_empty <i>suc2Δ::kanMX4</i><br>pBHY11::LEU        | this study          |
| TWY70   | MATa <i>his3Δ1 leu2Δ 0 lys2Δ 0 ura3Δ</i>                                                                                               | Walther et al. 2006 |
| FFY355  | Mat a <i>his3Δ1 leu2Δ0 lys2Δ0 ura3Δ0 VPS53-GFP::hphNT1</i>                                                                             | this study          |
| FFY99   | Mat a <i>leu2-3,112 trp1-1 can1-100 ura3-1 ade2-1 his3-11,15 ORM1-6xHA::HIS3</i>                                                       | this study          |

|         |                                                                                                                                                 |                     |
|---------|-------------------------------------------------------------------------------------------------------------------------------------------------|---------------------|
| FFY356  | Mat a <i>his3Δ1 leu2Δ 0 lys2Δ 0 ura3Δ Vps53(S790A)-GFP::HPH</i>                                                                                 | this study          |
| FFY202  | Mat a <i>his3Δ1 leu2Δ 0 lys2Δ 0 ura3Δ snf1Δ::KAN</i>                                                                                            | this study          |
| FFY2655 | Mat α <i>ura3-52 trp1Δ 2 leu2-3,112 his3-11 ade2-1 can1-100 vps53Δ::NAT pRS306_VPS53 TOM70-CV::HIS ZRC1-NV::kanMX4</i>                          | this study          |
| FFY2656 | Mat α <i>ura3-52 trp1Δ 2 leu2-3,112 his3-11 ade2-1 can1-100 vps53Δ::NAT pRS306_VPS53(S790A) TOM70-CV::HIS ZRC1-NV::kanMX4</i>                   | this study          |
| FFY2657 | Mat α <i>ura3-52 trp1Δ 2 leu2-3,112 his3-11 ade2-1 can1-100 l vps53Δ::NAT pRS306_VPS53(S790D) TOM70-CV::HIS ZRC1-NV::kanMX4</i>                 | this study          |
| FF1021  | Mat α <i>ura3-52 trp1Δ 2 leu2-3,112 his3-11 ade2-1 can1-100 vps53Δ::NAT pRS306_VPS53 lys2Δ::hphNT1 Vph1-mCherry::hphNT1 pXY142_mtGFP</i>        | this study          |
| FF1022  | Mat α <i>ura3-52 trp1Δ 2 leu2-3,112 his3-11 ade2-1 can1-100 vps53Δ::NAT pRS306_VPS53(S790A) lys2Δ::hphNT1 Vph1-mCherry::hphNT1 pXY142_mtGFP</i> | this study          |
| FF1023  | Mat α <i>ura3-52 trp1Δ 2 leu2-3,112 his3-11 ade2-1 can1-100 vps53Δ::NAT pRS306_VPS53(S790D) lys2Δ::hphNT1 Vph1-mCherry::hphNT1 pXY142_mtGFP</i> | this study          |
| FF1728  | Mat a <i>ura3-52 trp1Δ 2 leu2-3,112 his3-11 ade2-1 can1-100 VPS53-mKate:: KanMX5 VPS54-neon-Green:: NAT</i>                                     | this study          |
| FF1607  | Mat a <i>ura3-52 trp1Δ 2 leu2-3,112 his3-11 ade2-1 can1-100VPS53(S790A)-mKate::KanMX5 VPS54-neon-Green::NAT</i>                                 | this study          |
| FF1727  | Mat a <i>ura3-52 trp1Δ 2 leu2-3,112 his3-11 ade2-1 can1-100VPS53(S790D)- mKate:: KanMX5 VPS54-neon-Green:: NAT</i>                              | this study          |
| SSY605  | Mat a <i>leu2-3,112 trp1-1 ura3-1 his3-11,15 pho8Δ::HIS3 Δpho13::TRP1</i>                                                                       | Schuck et al., 2014 |
| SSY627  | Mat a <i>leu2-3,112 trp1-1 ura3-1 his3-11,15 pho8Δ::HIS3 Δpho13::TRP1 ura3::ADHpr-COXIV-Pho8Δ60-URA3</i>                                        | Schuck et al., 2014 |
| SSY298  | Mat a <i>leu2-3,112 trp1-1 ura3-1 his3-11,15 pho8Δ::HIS3 Δpho13::TRP1 ura3::ADHpr-COXIV-Pho8Δ60-URA3 pep4Δ::NAT</i>                             | this study          |

898

899 **Table 2 Plasmids**

| Vector | Gene/Insert                                         | Source                        |
|--------|-----------------------------------------------------|-------------------------------|
| pRS306 | pRS306_ empty                                       | Sikorski and Hieter, 1989     |
| pYX142 | pYX142_mtGFP (CEN LEU mitochondrially targeted GFP) | gift from Benedikt Westermann |

|         |                                                       |                               |
|---------|-------------------------------------------------------|-------------------------------|
| pRS415  | p415 ADH mtBFP (CEN LEU mitochondrially targeted BFP) | gift from Christian Ungermann |
| pGex6P1 | pGex6P1_SNF1(1-392)                                   | this study                    |
| pGex6P1 | pGex6P1_SNF1-T210A(1-392)                             | this study                    |
| pGex6P1 | pGex6P1_VPS53(552-822)                                | this study                    |
| pRS404  | pRS404_GAL1pr_ELM1(421-640)-TAP                       | this study                    |
| pRS306  | pRS306_VPS53                                          | this study                    |
| pRS306  | pRS306_VPS53(S790A)                                   | this study                    |
| pRS306  | pRS306_VPS53(S790D)                                   | this study                    |
| pBHY11  | pBHY11                                                | Horzadowski et al 1994        |

900

901 **Supplementary material**

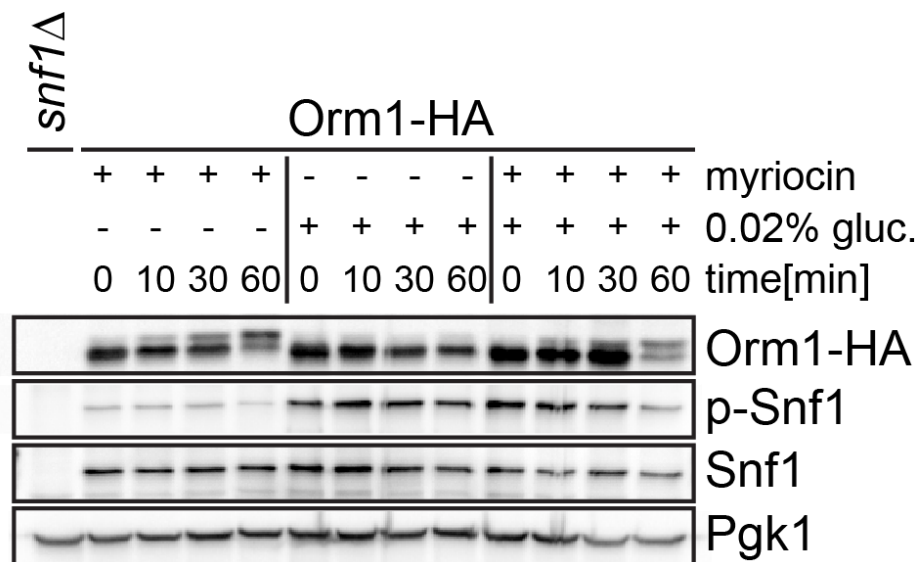

**Supplementary Figure 1: Sphingolipid depletion does not affect Snf1 phosphorylation.** Western blot analysis Yeast cells expressing Orm1-HA. Cells were grown in glucose and were untreated (control), depleted from glucose for 60 mins, treated with myriocin for 60 mins or a combination of glucose depletion and myriocin treatment. Samples were collected after 0 mins, 10 mins, 30 mins and 60 mins and analyzed by western blot. Differences in Orm1-HA migration reflect changes in its phosphorylation.

902

903

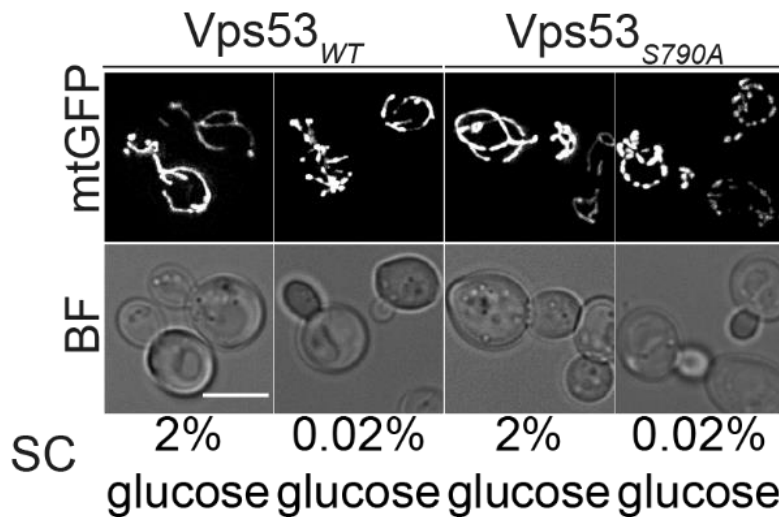

**Supplementary Figure 2: Vps53 mutation unbalances mitochondrial dynamics in glucose starved cells.** Mitochondrial morphology was assayed in glucose starved *VPS53* depleted cells co-expressing either *Vps53* or *Vps53<sub>S790A</sub>* and a mitochondrial matrix targeted GFP (mtGFP) from a plasmid. Starvation was induced for 90 min in logarithmically grown cells. Glucose starved *Vps53<sub>S790A</sub>* cells displayed fragmented mitochondria.

904

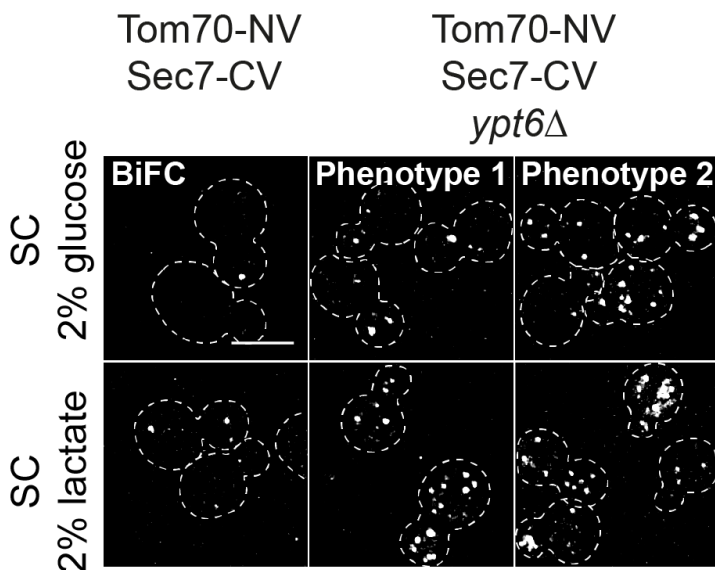

**Supplementary Figure 3: Depletion of the GARP recruiter Ypt6 leads to a considerable increased Venus signal-based GoMiCS formation.** Fluorescent complementation based analysis of *ypt6Δ* cells expressing Tom70-NV and Sec7-CV. Logarithmically grown cells were transferred for 90 min to lactate containing medium. The Golgi and mitochondria can be juxtaposed. Loss of the small GTPases Ypt6 affects proximity of the Golgi and mitochondria. Glucose grown cells displayed comparable signals of Venus foci to respiratory Ypt6 expressing cells (phenotype1) and even higher signals (phenotype2). Respiratory growth conditions resulted in considerably more foci (phenotype1) and patch like clusters of complemented Venus signals (phenotype2). Scale bar = 5μM

905

906 **Supplementary Table 1:** List of all proteins identified in GFP pulldown assays of  
907 *Vps53*-GFP, *Vps53<sub>S790A</sub>*-GFP and *Vps53<sub>S790D</sub>*-GFP expressing cells.

908 **Supplementary Table 2:** List of all proteins identified in cell lysates and vacuolar  
909 purifications of WT and *Vps53<sub>S790A</sub>* cells grown in the presence of lactate.

910

911
